# Emergent multilevel selection in a simple spatial model of the evolution of altruism

Rutger Hermsen<sup>\*1,2</sup>

<sup>1</sup>Theoretical Biology Group, Biology Department, Utrecht University, Padualaan 8, The Netherlands

<sup>2</sup>Centre for Complex Systems Studies, Utrecht University, Leuvenlaan 4, 3584 CE Utrecht, The Netherlands

## Abstract

Theories on the evolutionary origins of altruistic behavior have a long history and have become a canonical part of the theory of evolution. Nevertheless, the mechanisms that allow altruism to appear and persist are still incompletely understood. The spatial structure of populations is known to be an important determinant. In both theoretical and experimental studies, much attention has been devoted to populations that are subdivided into discrete groups. Such studies typically imposed the structure and dynamics of the groups by hand. Here, we instead present a simple individual-based model in which organisms spontaneously self-organize into spatially separated colonies that themselves reproduce by binary fission and hence behave as Darwinian entities in their own right. Using software to automatically track the rise and fall of colonies, we are able to apply formal theory on multilevel selection and thus quantify the within- and among-group dynamics. This reveals that individual colonies inevitably succumb to defectors, resulting in within-colony “tragedies of the commons”. Even so, altruism persists in the population because more altruistic colonies reproduce more frequently. The emergence of the colonies themselves depends crucially on the length scales of motility, altruism, and competition. This reconfirms the general relevance of these scales for social evolution, but also stresses that their impact can only be understood fully in the light of the emergent eco-evolutionary spatial patterns. The results also demonstrate that emergent spatial population patterns can function as a starting point for transitions of individuality.

---

\*r.hermsen@uu.nl

## Contents

|          |                                                                       |           |
|----------|-----------------------------------------------------------------------|-----------|
| <b>1</b> | <b>Introduction</b>                                                   | <b>3</b>  |
| <b>2</b> | <b>Results</b>                                                        | <b>4</b>  |
| 2.1      | Brief description of the model . . . . .                              | 4         |
| 2.2      | Emergent colonies and multilevel dynamics in the 2D habitat . . . . . | 6         |
| 2.3      | Colony formation is crucial for the evolution of altruism . . . . .   | 8         |
| 2.4      | Quantitative measurement of multilevel selection components . . . . . | 10        |
| <b>3</b> | <b>Discussion</b>                                                     | <b>12</b> |
| <b>4</b> | <b>Methods</b>                                                        | <b>14</b> |
| 4.1      | Detailed description of the model . . . . .                           | 14        |
| 4.2      | Implementation of the simulations . . . . .                           | 17        |
| 4.3      | Computational procedures . . . . .                                    | 18        |
| <b>5</b> | <b>Acknowledgments</b>                                                | <b>22</b> |
|          | <b>Appendices</b>                                                     | <b>26</b> |
| <b>A</b> | <b>The Price equation, evolutionary forces, and MLS 1 &amp; 2</b>     | <b>26</b> |
| A.1      | The Price equation . . . . .                                          | 26        |
| A.2      | Measuring selection, random drift, and mutational bias . . . . .      | 26        |
| A.3      | Multilevel selection 1 . . . . .                                      | 27        |
| A.4      | Multilevel selection 2 . . . . .                                      | 28        |
| <b>B</b> | <b>Linear stability analysis</b>                                      | <b>29</b> |
| B.1      | Mathematical analysis . . . . .                                       | 29        |
| B.2      | Validation of predictions . . . . .                                   | 31        |

## 1 Introduction

Over the past decades, a rich body of theoretical research has been devoted to the evolution of social behaviors [1, 2]. In particular, much theory has focused on the evolution of cooperation [3, 4], and more narrowly, altruism [5, 6]: behavior that is costly to the actor but beneficial to its interaction partners. Historically, how natural selection could favor altruism has been a puzzle, but in broad terms the solution has long been understood: altruism can be selected if its benefits accrue disproportionately to altruists, thus offsetting their costs [3, 7–9]. Nevertheless, the mechanisms that allow such an interaction structure to exist and persist are still a matter of intense study and debate [4].

Many classical studies considered populations that are subdivided into distinct groups (*e.g.*, [10–14]). In such a group or “multilevel” structure, altruistic behavior can be selected provided altruists tend to be grouped together and groups with a higher proportion of altruists tend to have higher mean fitness [11]. In nearly all theoretical models of multilevel selection, the group structure and group-level dynamics are imposed or presupposed by the definition of the model. In contrast, we here present a very simple individual-based model in which altruistic organisms *self-organize* into discrete colonies. Moreover, these colonies themselves spontaneously reproduce by growth and binary fission and hence act as Darwinian entities in their own right. In time, each individual colony is fated to collapse; but when it does, another colony grows and divides, giving rise to the kind of multi-level dynamics that in previous models had to be imposed by hand [14]. Such rudimentary, emergent higher-level entities could be a first step towards a full “transition of individuality” [15].

The model describes a spatial environment inhabited by motile organisms that reproduce and interact locally. As has long been known, local interactions combined with local mating and reproduction can foster altruism if motility is limited, because this allows altruists to aggregate in assorted neighborhoods where they mainly benefit each other [16–18]. However, mathematical and computational models have revealed an important limitation [19–22]. If not only social interactions but also competitive interactions take place locally (“soft” selection [23, 24]), altruists in assorted domains tend to compete with other altruists, in which case the benefits of altruism may be largely or fully canceled by the concomitant increased competition. This local Malthusian trap is alleviated somewhat if the local carrying capacity increases with the proportion of altruists (“elastic” selection), which allows clusters of altruists to become net population sources [25]. Importantly, it can also be avoided if competitive interactions reach beyond the social group or neighborhood, so that clusters of altruists can support each other at the expense of others [17, 19, 22, 26]. This highlights the importance of the relative *scales* of motility, altruism, and competition [1]. As a rule, altruism is favored by limited motility and local social interactions, but global competition.

Long-range competition can come in many implicit forms. For instance, the life cycle of organisms may include a dispersal stage such that individuals can first cooperate with relatives and then compete with non-relatives [19], or the group dynamics may include a global mixing stage in which groups or neighborhoods are periodically fragmented and new ones are seeded [27–29]. To study the effects of the scales of motility, altruism and competition systematically, the model presented here is deliberately designed such that these scales can be set explicitly and independently. As it turns out, their role is much more intricate than anticipated because they play an essential role in the emergence of the colonies and hence in the resulting multilevel eco-evolutionary

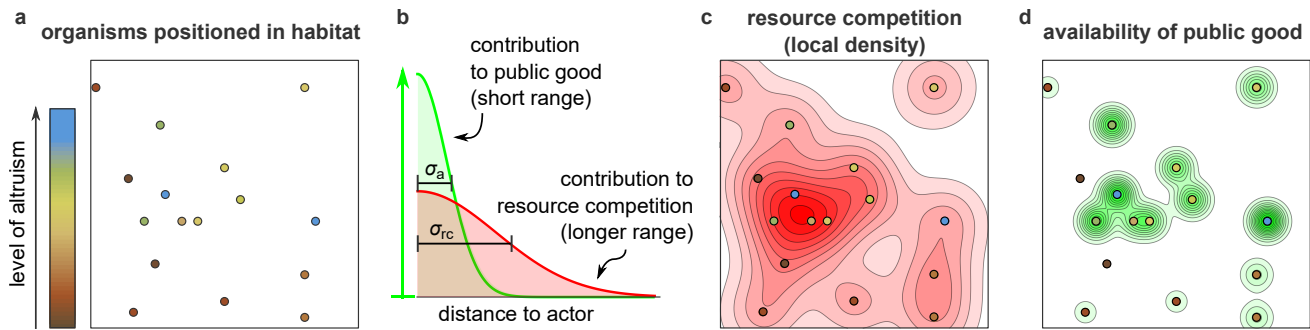

**Figure 1. Illustration of the model.** (a) The model considers a population of individuals, here represented as circles, in an explicitly spatial habitat. Individuals reproduce, die, and move stochastically, and are characterized by their level of altruism, indicated in color. Altruism is costly to the actor, but beneficial to recipients: it increases their reproduction rate. (b) For concreteness, imagine that each altruist produces a public good and secretes it locally. The contribution of a particular altruist to the concentration of public good falls with the distance (green curve) and increases with the level of altruism of the actor (vertical arrow). At the same time, individuals compete for a limiting resource: the reproduction rate of each individual is inhibited by each individual in its neighborhood (red curve). The scale of altruism  $\sigma_a$  and the scale of resource competition  $\sigma_{rc}$  are indicated. (c & d) The competition experienced at any coordinate (panel c, red contour plot) and the availability of public good at any position (panel d, green contour plot) are obtained by summing up the contributions of all individuals.

39 dynamics.

40 To quantitatively analyze model simulations, we use software that automatically tracks the rise and fall  
41 of colonies. Subsequently, we apply existing formal theory to quantify the contributions to selection at the  
42 individual and colony levels. This demonstrates that, within colonies, natural selection favors defectors who  
43 profit from the altruists in their neighborhood but do not share in the costs. But colonies characterized by a  
44 higher average level of altruism survive longer and reproduce more frequently, resulting in positive selection at  
45 the colony level. The steady level of altruism that eventually establishes can be understood as a balance between  
46 these forces: a perpetual “tragedy of the commons” [30] within colonies, compensated by positive selection  
47 among them.

## 48 2 Results

### 49 2.1 Brief description of the model

50 We start with a brief specification of the model; details are supplied in the Methods.

51 The model considers a population of discrete individual in a two-dimensional (2D) or one-dimensional (1D)  
52 habitat (see Fig. 1a). Individuals possess just one continuous trait  $\phi$ , representing their investment in altruistic  
53 behavior, and they do only three things: move, in an unbiased fashion modeled by diffusion; die, at a constant  
54 (Poisson) rate; and reproduce asexually.

55 The rate of reproduction of each individual depends on three quantities. First, it decreases with the individual’s  
56 own investment in altruism: altruism is costly. A level of altruism of  $\phi = 0.05$  means that the individual sacrifices  
57 5% of its reproduction rate relative to a defector ( $\phi = 0$ ) under the same conditions. Second, the reproduction rate  
58 also decreases with the population density in the individual’s local neighborhood. This models competition for

| parameter                                        | symbol                     | default (2D)       | default (1D)       |
|--------------------------------------------------|----------------------------|--------------------|--------------------|
| death rate                                       | $d$                        | 1                  | 1                  |
| scale of altruism                                | $\sigma_a$                 | 1                  | 1                  |
| reproductive deficit per unit of the trait value | $c$                        | 1                  | 1                  |
| basal reproduction rate                          | $g_0$                      | 5                  | 5                  |
| scale of competition                             | $\sigma_{rc}$              | 4                  | 4                  |
| motility (diffusion) constant                    | $k_D$                      | $4 \times 10^{-2}$ | $3 \times 10^{-2}$ |
| factor scaling carrying capacity                 | $K$                        | 40                 | 100                |
| basal benefit of altruism                        | $b_0$                      | 1                  | 0.5                |
| maximal benefit altruism                         | $b_{\max}$                 | 5                  | 2                  |
| mutation probability upon reproduction           | $\mu$                      | $1 \times 10^{-3}$ | $5 \times 10^{-4}$ |
| mean effect size of mutations                    | $m$                        | $5 \times 10^{-3}$ | $5 \times 10^{-3}$ |
| scale of motility                                | $\sigma_m = \sqrt{2k_D/d}$ | 0.283              | 0.245              |

**Table 1.** Model parameters and their default values for simulations with the 1D and 2D habitat. Units of time, length, and trait are defined such that the death rate  $d$ , the scale of altruism  $\sigma_a$ , and the reproductive deficit per unit of the trait are 1. All other parameters are expressed in these units.

resources and establishes a finite carrying capacity. The local population density is measured as a Kernel Density Estimate (KDE), using a normal distribution with standard deviation  $\sigma_{rc}$  as the kernel function. This means that individuals compete strongly with each other only if their spatial separation is of order  $\sigma_{rc}$  or less (see Fig. 1b, red line, and 1c), so that  $\sigma_{rc}$  can be interpreted as the *scale of competition*. Third, an individual's reproduction rate increases if altruists are present in its local neighborhood (Fig. 1b, green line, and Fig. 1d). The altruism experienced at a given position  $\mathbf{y}$ , denoted  $A(\mathbf{y})$ , is again quantified as a KDE, but now individuals are weighted in proportion to their level of altruism  $\phi$ . Although the model is not intended to mimic a specific altruistic behavior or mechanism, it is convenient to think of  $A(\mathbf{y})$  as the concentration of some public good secreted by altruistic organisms. If more and more public good is added to the local neighborhood, the benefit eventually saturates. The standard deviation of the kernel function used to calculate  $A(\mathbf{y})$  is called  $\sigma_a$  and generally differs from  $\sigma_{rc}$ . Because individuals profit significantly from the public good produced by others only if their separation is of order  $\sigma_a$  or less,  $\sigma_a$  can be interpreted as the *scale of altruism*.

It is worth emphasizing that, contrary to some other models [31, 32], complete defectors (with  $\phi = 0$ ) are perfectly viable; altruism is not required for the survival of the population.

When an individual reproduces, the offspring appears at the coordinates of the parent; afterwards, parent and offspring move independently and thus part ways. Offspring usually inherits the trait value of the parent, but with a small probability a mutation occurs that increases or decreases it at random.

In simulations, space and time are discretized, and periodic boundary conditions are imposed. Default parameter values are listed in Table 1. Throughout the text, the time unit is the inverse of the death rate, called the “generation time”. Importantly, the scale of altruism  $\sigma_a$  is used as the unit of length and hence  $\sigma_a = 1$  by definition. Thus, just two length scales remain: the scale of competition  $\sigma_{rc}$  and the scale of motility,  $\sigma_m$ . The latter is defined as the typical (that is, root-mean-square) distance traveled by an individual in a generation time (see Methods).

## 82 2.2 Emergent colonies and multilevel dynamics in the 2D habitat

83 The complex behavior of the simple model is illustrated in Fig. 2, which presents results of a single simulation  
84 run using a 2D habitat. These results are representative for the default parameters (see replicates in Fig. S1)  
85 but the parameters themselves have been chosen deliberately to enable the evolution of altruism. In particular,  
86 motility is slow and the scale of competition  $\sigma_{rc}$  is four times larger than the scale of altruism  $\sigma_a$ .

87 As shown in Fig. 2a, all individuals are initialized as defectors, but in time the mean level of altruism steadily  
88 increases (thick colored line) before reaching a plateau. To confirm that this rise is largely due to natural selection  
89 rather than random drift or mutational bias, we measured the cumulative contribution of natural selection (black  
90 line), which is consistently positive (also see Fig. S1 and Appendix A.2).

91 The surprising spatial dynamics of the simulation are visualized in the snapshots of Fig. 2b and, more  
92 mesmerically, in Movies S1-3. While individuals are initially distributed uniformly at random, they spontaneously  
93 organize into dense colonies surrounded by “exclusion zones”. These colonies subsequently organize into a  
94 hexagonal pattern; to illustrate this, a hexagonal grid is overlaid in the right-most panel of Fig. 2b. To further  
95 characterize the pattern we determined the radial distribution function, which is defined as the distribution of  
96 distances between all pairs of individuals, normalized by the random expectation (Fig. 2c). The long-ranged  
97 oscillations in this distribution reveal a lattice constant of  $a \approx 8.4$ , consistent with estimates based on the number  
98 of colonies found in the habitat (see Methods). The mechanism producing the pattern is analogous to that  
99 of the famous Turing patterns in reaction–diffusion systems [33], as will discuss in some detail below and in  
100 Appendix B.

101 The pattern, however, is not static. In Fig. 2d, enlargements are shown of a small region of the habitat.  
102 Consider the colony marked by the red circle. Initially, the colony is mostly blue, indicating that most individuals  
103 in this colony are highly altruistic. In time, however, the color degrades from blue to brown, reflecting a decline  
104 in altruism, and eventually the colony goes extinct. As best seen in Movies S1–3, this fate is bestowed on many  
105 colonies in the simulation. This suggests that altruistic colonies are sensitive to corruption by defectors that  
106 occasionally appear by mutation or invasion from neighboring colonies, resulting in a within-colony “tragedy of  
107 the commons” [30].

108 In the same figure, however, green arrows point to what happens after a colony disappears: a different colony  
109 nearby initially grows in size and then spontaneously divides in two, locally restoring the hexagonal pattern.  
110 Daughter colonies inherit their over-all color from their parent colony. Importantly, it appears in Movie S1–3  
111 that colonies with a high mean level of altruism divide particularly rapidly and thus manage to multiply and  
112 spread.

113 All in all, these observations suggest that the colonies themselves behave like Darwinian replicators: they  
114 die, reproduce by binary fission, and show heritable variation in their level of altruism. Moreover, in view of  
115 the tragedy of the commons seen within colonies, the colony-level dynamics appear crucial for the evolution of  
116 altruism.

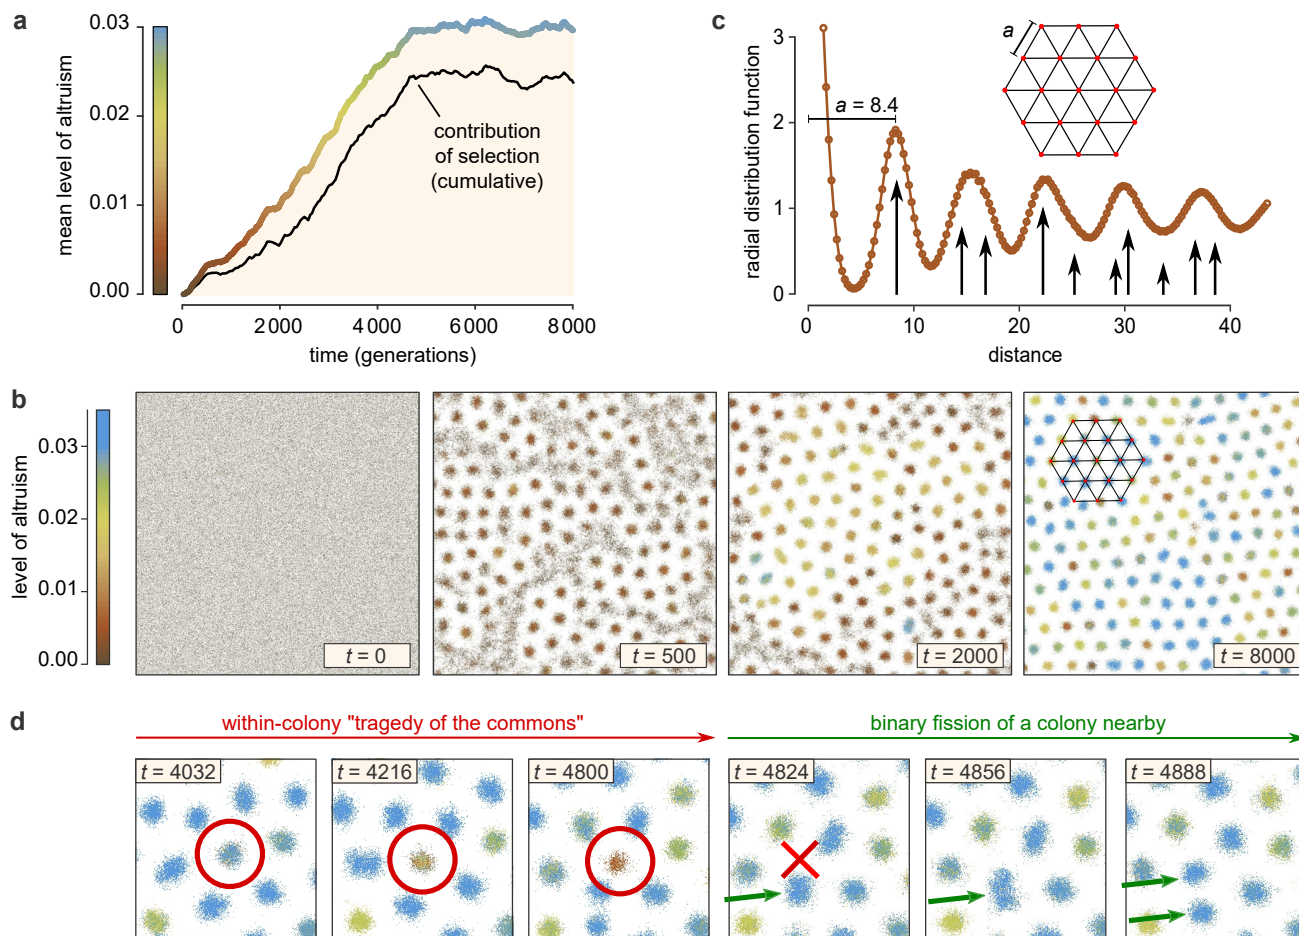

**Figure 2. Altruism and colonies emerge in the two-dimensional habitat.** Results are shown from a representative simulation run (see Fig. S1 for replicates) with default parameters (see Table 1). (a) Mean level of altruism versus time (thick colored line) as well as the cumulative contribution of natural selection (black), which is consistently positive (see Appendix A.2). (b) Snapshots of the simulation habitat; also see Movies S1–3. In time, the population self-organizes into a hexagonal pattern of discrete colonies. A section of a hexagonal grid is superimposed in the right-most panel. (c) The hexagonal pattern is also apparent from the radial distribution function at  $t = 8000$ , the distribution of distances between pairs of individuals normalized by the random expectation. Black arrows indicate the distances occurring in an exact hexagonal grid with grid constant  $a = 8.4$  and their relative frequency. (d) Enlargements of a small domain of the habitat, showing that the colonies behave like Darwinian entities: they disappear as a result of a within-colony tragedy of the commons [30] (red circle and cross), and reproduce by binary fission (green arrows).

## 117 **2.3 Colony formation is crucial for the evolution of altruism**

118 So far, the evidence we presented on the dynamics of colonies has been anecdotal and qualitative. To further  
119 study the behavior of the model and obtain quantitative results, we now shift to a one-dimensional habitat.  
120 Simulations with a one-dimensional habitat are considerably faster, allowing many parameter settings to be  
121 explored, and are analyzed more readily, both mathematically and computationally.

### 122 **Automated multilevel lineage tracking**

123 Qualitatively, the behavior of the 1D model is analogous to that of the 2D model. Fig. 3a shows a section of  
124 the space-time arena for a simulation with default parameters (see Table 1). The left-hand side of the figure  
125 (gray scale) presents the population density. The striped pattern clearly reveals the formation of regularly  
126 spaced colonies that can persist for thousands of generations. An algorithm was used to detect these colonies  
127 automatically and track them in time (see Methods). The right-hand side of the figure plots the center of mass of  
128 the tracked colonies; colors represent the mean level of altruism of the individuals populating the colonies. In  
129 the middle part of the figure, density and traces overlap to showcase their consistency. Some traces suddenly  
130 end, indicating that the colony went extinct. Such events are detected automatically and indicated with a black  
131 square. From the figure, it is apparent that prior to the death of a colony the mean level of altruism always  
132 declines, suggesting a tragedy of the commons. In other places, traces suddenly fork, which is also automatically  
133 marked with orange circles. Clearly, the colonies in the 1D habitat reproduce by binary fission (like their 2D  
134 counterparts); the daughter colonies inherit their color from their parent. Again it appears that more altruistic  
135 colonies divide more frequently.

### 136 **Colonies emerge due to a linear instability and enable altruism**

137 The mechanisms behind the emergence of colonies in the 1D habitat can be studied mathematically using linear  
138 stability analysis (LSA). We envision a population of individuals with a fixed level of altruism  $\phi$  homogeneously  
139 distributed over a large habitat that is populated at carrying capacity. Next we superimpose a tiny periodic  
140 density variation with some wavelength  $\lambda$  and derive under which conditions this perturbation is expected  
141 to grow exponentially, resulting in “colonies”. This also allows us to make approximate predictions on the  
142 wavelength of the emerging pattern, *i.e.*, the distance between colonies. Details are found in Appendix B and  
143 Fig. S2.

144 The LSA reveals that colonies are expected to develop only for certain combinations of the scales of altruism,  
145 competition, and motility (Fig. 3c; remember that  $\sigma_a = 1$  by definition). As the LSA elegantly demonstrates  
146 (Appendix B) the appearance of colonies is determined by a tug of war between these three forces. Altruism  
147 by itself tends to amplify differences in local density: areas with a high density contain more altruists, which  
148 positively affects the reproduction rate and hence further increases the density. This drives the emergence  
149 of colonies. However, this force is weak for density variations with a wavelength shorter than  $\sim \sigma_a$ , which  
150 average out within the scale of altruism. Resource competition quenches density differences because it suppresses  
151 reproduction in densely population areas. This force, however, is weak for variations with wavelengths shorter  
152 than  $\sim \sigma_{rc}$ , which are averaged out within the scale of resource competition. Lastly, random motility also tends



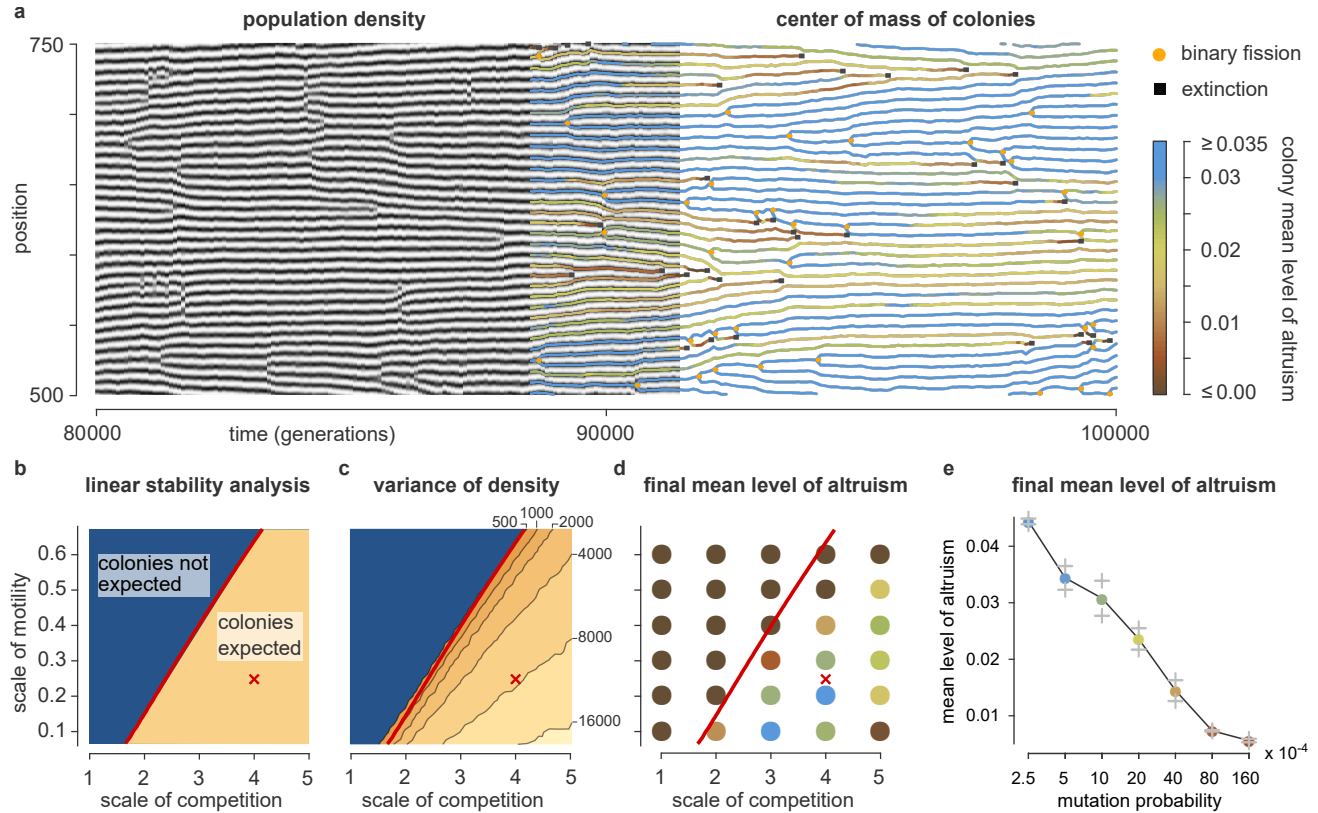

**Figure 3. The origins of altruism and colony formation in the one-dimensional habitat.** (a) Dynamics of a representative simulation run (see Fig. S3) with default parameters (Table 1). A small domain of space-time is visualized. The left-hand part of the figure shows the local population density; the striped pattern indicates that regularly spaced colonies develop. The right-hand side plots the center of mass of each colony; color indicates mean level of altruism. The two representations overlap in the middle of the figure to demonstrate their consistency. Black squares mark the deaths of colonies; orange circles indicate reproduction of colonies by binary fission. (b) Prediction from linear stability analysis. (See also Appendix B and Fig. S2.) Colonies are expected to emerge in the yellow part of the phase diagram where the scale of competition is clearly larger than the scale of altruism ( $\sigma_a = 1$  by definition) and the scale of motility is small. The red cross marks the default parameters used in panel (a). (c) Simulation results testing the prediction of panel (b). As predicted, colonies emerge only in the region to the right of the red line, which is copied from panel (b): the variance of the local population density increases precipitously when the line is crossed. (d) Mean level of altruism at the end of evolutionary simulations. Altruism evolves only in the regime where colonies can form. Each data point plotted represents the mean of three independent replicate simulations. (e) Same as (d), but as a function of mutation probability  $\mu$ . Two independent replicates are plotted in gray; colored circles represent their mean value.

153 to homogenize the density, but this force is ineffective against variations with wavelengths that are larger than  
154  $\sim \sigma_m$  because random motion is famously slow at large scales. Together, this means that colonies form only if  
155  $\sigma_m$  is small compared to the other scales and  $\sigma_a$  is clearly smaller than  $\sigma_{rc}$ , so that wavelengths exist that are  
156 too long to be quenched by motility, long enough to be amplified by altruism, but too short to be suppressed by  
157 resource competition (see Fig. S2a).

158 To test these predictions, Fig. 3c presents results from a large number of simulations using a range of values of  
159  $\sigma_m$  and  $\sigma_{rc}$  ( $19 \times 21 = 399$  simulations in total) in which all individuals are given an immutable value of  $\phi = 0.05$ .  
160 Each simulation quantified to what extent colonies developed by simply measuring the variance in the local  
161 population density. The results are as expected: when crossing over from the linearly stable (blue) to the linearly  
162 unstable (yellow) region of Fig. 3b the variance in the local density increases precipitously. The wavelengths  
163 of the emerging patterns —typically close to  $2\sigma_{rc}$ — also broadly match predictions (Fig. S2c,f). We therefore  
164 conclude that the LSA accurately describes and explains the emergence of the colonies.

165 From the observations of both the 1D and the 2D model it appeared that the emergence of colonies is important  
166 for the evolution of altruism. This suggests that appreciable levels of altruism should evolve only in the parameter  
167 regime where colonies can emerge for reasonable levels of altruism (the linearly unstable, yellow region of  
168 Fig. 3b,c). This is confirmed by a series of simulations for various scales of motility and competition (Fig. 3d).  
169 Because the colony formation depends on the existence of altruism, but the persistence of altruism in turn  
170 depends on the formation of colonies, the process must pull itself up by the bootstraps. Random mutations plus  
171 local reproduction spontaneously result in unstable colonies with modest levels of altruism and high internal  
172 levels of drift. This occasionally produces a colony that is altruistic enough to reproduce, which starts to spread  
173 rapidly.

174 Factors other than the spatial length scales clearly also affect whether altruism prevails. If the scale of  
175 competition becomes too large relative to the scale of motility, the mean level of altruism suffers (Fig. 3d, *e.g.*  
176 at  $\sigma_{rc} = 5$  and  $\sigma_m = 0.1$ ). Also, the stability of colonies against corruption by defectors is affected by the rate  
177 with which such defectors are created by mutations. In line with this, the mean level of altruism decreases  
178 if the mutation probability is increased (Fig. 3e). That said, altruism emerges for a broad range of mutation  
179 probabilities.

## 180 2.4 Quantitative measurement of multilevel selection components

181 To formally analyze and quantify the role of the colony dynamics in the selection of altruism, we make use of  
182 two existing mathematical results. Both are based on subtly different formalizations of the concept of group  
183 selection that are sometimes referred to as multilevel selection (MLS) 1 and 2 [13, 35] (see Appendix A for brief  
184 derivations).

185 Each of the two results relies on a different application of the Price equation [34, 36, 37]. The Price equation  
186 decomposes the change in the population mean of a trait  $\phi$  over a time interval  $\Delta t$  into two parts: the selection  
187 differential  $S$ , which quantifies the contribution of natural selection, and the transmission term  $T$ , reflecting  
188 systematic differences between the trait value of ancestors and their offspring.

189 MLS 1 is based on the fact that, in a population that is subdivided into groups, the selection differential  $S$  can

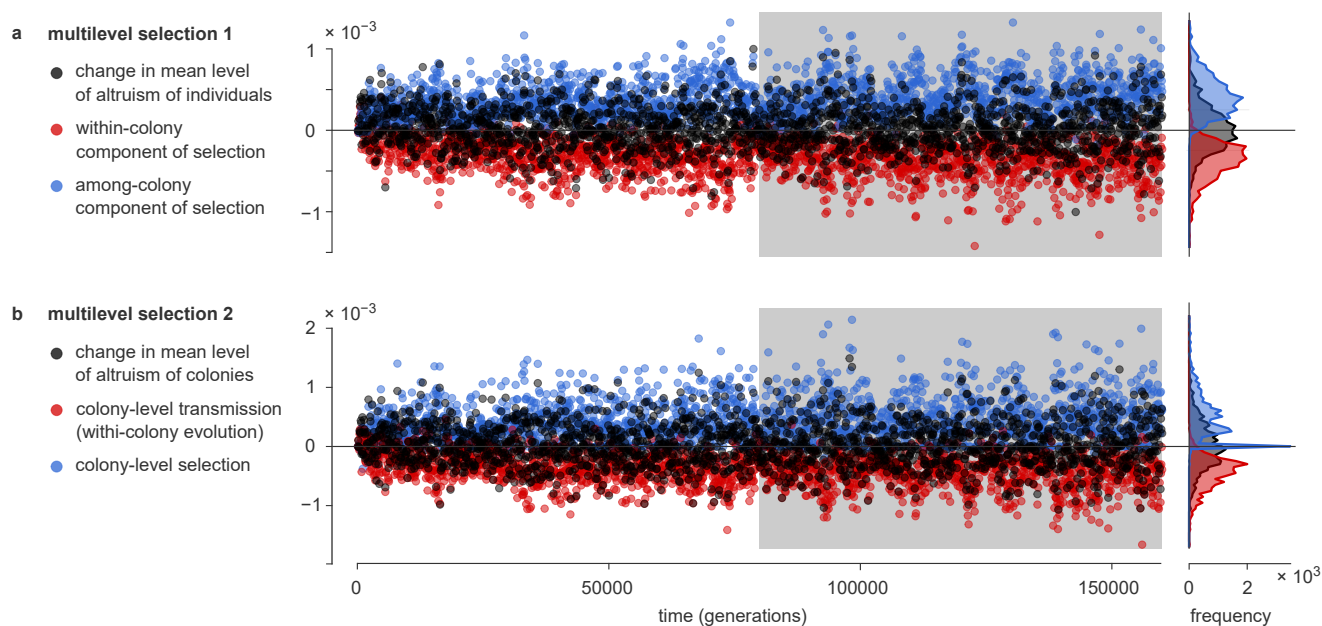

**Figure 4. Quantification of multilevel selection: two approaches.** (a) The first approach (MLS 1) is to mathematically split the natural selection measured acting on the organisms into two parts: selection within and selection among colonies [34]. (See Appendix A.3.) For the simulation shown in Fig. 3a, this calculation was done for each subsequent interval of 80 generations (see Methods). Plotted is the change in the mean level of altruism (black), and the within-colony (red) and among-colony (blue) components of selection. The rotated histograms on the right-hand side show distributions based on second half of the simulation, indicated with the gray background. In this part of the simulation, the population mean level of altruism no longer changed systematically. However, within-colony selection is nearly always negative, compensated by positive among-colony selection. (b) The second approach (MLS 2) describes evolution at the level of the colonies. (See Appendix A.4.) Evolution taking place within colonies then appears as a transmission bias: a bias in the change between ancestor and offspring colonies in the colony mean level of altruism. This transmission bias (red) tends to be negative, but is compensated by positive selection at the colony level. Fig. S3 shows the results of two more replicate simulations.

190 be split into two components:  $S = S_{\text{within}} + S_{\text{among}}$ . Here  $S_{\text{within}}$  is the (weighted) mean of the selection differential  
191 measured *within* groups, while  $S_{\text{among}}$  is the covariance between a group's mean trait value and its mean fitness,  
192 which can be interpreted as the selection *among* groups.

193 Our observations suggested that selection within colonies tends to be negative, which is to say that  $S_{\text{within}}$   
194 is systematically negative. To compensate,  $S_{\text{among}}$  would have to be positive as a rule. To test this, we split the  
195 simulation illustrated in Fig. 3a into 2000 time intervals of 80 generations each and calculated  $S_{\text{within}}$  and  $S_{\text{among}}$   
196 for each of these time intervals. The results, plotted in Fig. 4a, confirm the expectations. Over the last 1000  
197 intervals (shaded background in Fig 4), the mean level of altruism no longer changed significantly. (Mean change  
198 per time interval:  $(0.9 \pm 2.0) \times 10^{-5}$ , where the uncertainty denotes a 95% confidence interval; see Methods.) But  
199 over the same period, the within-colony component of selection was negative during 97.6% of the time intervals,  
200 averaging  $(-3.8 \pm 0.4) \times 10^{-4}$ . In contrast, the among-colony component was positive in 98.7% of the time intervals,  
201 with a mean of  $(4.2 \pm 0.4) \times 10^{-4}$ . Hence, selection within colonies is indeed negative (reflecting the within-colony  
202 tragedy of the commons), but this is compensated by a positive among-colonies component of selection.

203 The analysis of MLS 1 applies the Price equation to the population of individuals. MLS 2 instead applies it to  
204 the population of *colonies*. The mean level of altruism of individuals in a colony,  $\Phi$ , is now considered a trait of  
205 that colony, and the fitness of a colony is defined as the number of offspring *colonies* that it has at the end of the  
206 time interval. The Price equation can then be used to describe the change in the mean level of altruism of the  
207 colonies. The selection differential  $S$  now measures whether colonies with a high value of  $\Phi$  tend to produce  
208 more offspring colonies, and hence can be interpreted as the colony-level selection on  $\Phi$ . The transmission term  
209  $T$  now quantifies to what extent the  $\Phi$ -value of offspring colonies systematically differs from those of their  
210 ancestral colonies. Hence,  $T$  characterizes the internal evolution of colonies.

211 We suspected that colonies with a higher mean level of altruism reproduce more frequently, and hence  
212 that the colony-level selection is predominantly positive. To test this, we applied the MLS 2 framework to the  
213 same 2000 time intervals used for the MLS 1 analysis, making use of the automatically acquired colony-level  
214 lineage traces to measure the fitness values of the colonies. The result, plotted in Fig. 4b, again confirms the  
215 expectations. Over the last 1000 time intervals, the mean level of altruism of colonies  $\bar{\Phi}$  no longer changed  
216 significantly. (Mean change per time interval:  $(0.9 \pm 2.0) \times 10^{-5}$ .) In the same window, colony-level selection was  
217 positive in 82.2% of the time intervals, and negative in only 1.6%. (In the remaining intervals, none of the colonies  
218 reproduced or died, resulting in a colony-level selection of precisely 0.) Its mean value was  $(4.7 \pm 0.5) \times 10^{-4}$ .  
219 This was compensated by the colony-level transmission term, which was negative in 97.5% of the intervals, with  
220 an average of  $(-4.6 \pm 0.4) \times 10^{-4}$ . From this we conclude that the mean level of altruism of individual colonies  
221 tends to decrease with time, compensated by an increased rate of reproduction of colonies with a higher level of  
222 altruism.

### 223 3 Discussion

224 Above, we have presented a simple model of the evolution of altruism. Despite its simplicity, the model displays  
225 complex dynamics. Under suitable parameter settings, a linear instability permits a process of evolutionary  
226 bootstrapping in which colonies of altruists emerge that themselves reproduce by binary fission. Quantitative

227 measurements demonstrated that defectors have the upper hand within colonies, but that colonies with a higher  
228 mean level of altruism reproduce more frequently. The net effect is that a significant level of altruism persists in  
229 the population.

230 Complex biological systems invariably show a hierarchical organization, with collectives of individuals at  
231 one level forming entities at a higher level. The evolution of such hierarchical structures involves transitions  
232 in which collectives of individuals start to behave as Darwinian individuals. An important open question in  
233 evolutionary theory is what mechanisms and conditions allow such transitions in individuality to take place [15].  
234 While many theoretical models study evolution in hierarchical population structures, most take this structure as  
235 given (e.g., [14, 38]). In other models the spatial dynamics do spontaneously produce hierarchical structures, but  
236 with aggregates that cannot naturally be considered Darwinian entities because they are either too short-lived  
237 or do not replicate in a clear-cut sense (e.g., [39–41]). In yet other models, the formation of collectives is initially  
238 “scaffolded” by preexisting environmental structure [15]. In this light, a distinguishing feature of the current  
239 model is that group-level Darwinian replicators emerge spontaneously by self-organization; to our knowledge,  
240 few other models have this property (but see [42]). The formation of spatial density patterns is very common in  
241 nature and can result from various mechanisms [43]. The model that we presented reconfirms that, even in the  
242 absence of a preexisting ecological scaffold, such ecological self-organization can naturally result in competition  
243 and replication at the level of aggregates. Possibly, once natural selection is able to act at the level of such  
244 emergent aggregates, this opens an avenue towards a more complete transition of individuality.

245 Classical theory argues that the relative scales associated with motility, social interactions and competition  
246 are of crucial importance for the evolution of altruism (see Introduction). The results of the model confirm  
247 this: as expected, altruism evolves only if motility is limited and the scale of competition is larger than the  
248 scale of altruism. The significance of the scales, however, is much more involved than anticipated because they  
249 largely determine the emerging ecological patterns, which in turn shape the evolutionary dynamics. Indeed,  
250 the evolutionary dynamics support altruism (Fig. 3d) only if the ecological dynamics support the formation of  
251 colonies (Fig. 3c). This emphasizes that it is unlikely that the eco-evolutionary behaviors of complex dynamical  
252 models can be summarized by generic rules of thumb.

253 Superficially, the model is reminiscent of the ecological public-good (EPG) games of Wakano *et al* [32], which  
254 also produce intricate spatial patterns, including Turing patterns. But upon closer inspection the two models  
255 differ fundamentally in multiple aspects. In the EPG model all interactions are entirely local. Its pattern formation  
256 depends on a coexistence equilibrium point that has no counterpart in the current model, and parameters are  
257 chosen such that defectors are not viable without altruists. In addition, a necessary condition for the Turing  
258 patterns of the EPG model is that defectors are more motile than altruists; this distinction does not exist in our  
259 model. Importantly, the authors do not report that their colonies replicate, although perhaps such behavior  
260 could be obtained in a particular parameter regime. To sum up, the mechanisms producing the spatial patterns  
261 qualitatively differ between the two models and the EPG model does not display similar multilevel dynamics.

262 The concepts of multilevel and group selection and their relation to inclusive fitness theory are the subject of  
263 a longstanding and fierce debate [44–48]. Here, we do not engage in this debate. Given the remarkable colony  
264 dynamics in the model, the multilevel perspective is particularly apt and allowed us to test relevant hypotheses.  
265 But several other theoretical frameworks and fitness-accounting schemes [9], including inclusive fitness theory,

266 could be applied as well, to address different questions. We do note that the model violates multiple assumptions  
267 that are frequently made in the derivation of inclusive fitness results, since neither population size nor density  
268 are constant, the benefits of altruism are non-linear, interaction strengths are non-binary, competition is local,  
269 and the scales of altruism and competition differ. Many standard results therefore do not apply directly.

270 In the literature, multiple conceptualizations of multilevel selection exist including MLS 1, MLS 2, and  
271 Contextual Analysis [35, 49]. As to which of these methods best captures the concept of multilevel selection no  
272 consensus has yet been reached [13]. Above, we have used the decompositions of MLS 1 and 2 essentially as  
273 alternative descriptive statistics, each measuring different but well-defined properties of the system. For example,  
274 the colony-level selection term of MLS 2 confirms that more altruistic colonies have more offspring, irrespective  
275 of whether one considers this term a (or even the sole) proper measure of the concept of group selection. Similarly,  
276 the within-group contribution to selection of MLS 1 is a useful measure to test the hypothesis that selection  
277 within colonies is negative on average. We could have applied Contextual Analysis too, to confirm associations  
278 between individual or contextual properties and fitness [24, 35]. Their conceptual caveats notwithstanding, each  
279 of these methods provides a different vantage point and potentially new insights. The features of our model  
280 make it ideally suited to illustrate and test the various approaches of multilevel selection.

281 Models of evolution in subdivided populations usually assume that the fitness of individuals depends solely on  
282 their own traits and those of other group members. Any spatial structure at the sub-colony scale is thus ignored.  
283 Moreover, it is typically assumed that groups compete equally among each other, ignoring spatial structure  
284 at scales beyond the size of a group. In applications, these assumption are approximations at best, and they  
285 certainly do not hold in our model because colonies are not homogeneous and the colony-level dynamics clearly  
286 result in spatial assortment of colonies (see Fig. 2b and Fig. 3a). This does not invalidate MLS theory, but serves  
287 to remind us that we cannot expect to perceive a complete picture from a single vantage point. In a forthcoming  
288 article, we describe an complementary *multiscale* approach that allows natural selection to be decomposed into  
289 contributions at each spatial scale [50]. This approach can be used to analyze the importance of structures below  
290 and beyond the colony level; it is also applicable to models that generate spatial structures such as spirals and  
291 waves that are relevant to selection but perhaps too ephemeral to be conceptualized as groups. More generally,  
292 over the years many evolutionary concepts have been formalized mathematically [51], but these results are  
293 rarely applied to computational and individual-based models. Despite each formalism's limitations, together they  
294 provide a valuable toolbox that allows models to be scrutinized quantitatively from multiple perspectives [35, 52].  
295 We hope that future studies take full advantage of its potential.

## 296 **4 Methods**

### 297 **4.1 Detailed description of the model**

#### 298 **Definition of the model**

299 We envision a population or individuals living in a large habitat, which can be one- or two-dimensional. Each  
300 individual is fully characterized by its spatial coordinates plus the value of a single quantitative trait  $\phi$ , which  
301 indicates its investment in altruistic behavior. The behavior of the individuals is defined by just four stochastic

302 processes: death, motility, reproduction, and heredity with mutation.

303 **Death** strikes each individual at a fixed (Poisson) rate  $d$ ; if an individual dies, it disappears from the population.  
304 The average lifespan of an individual is  $d^{-1}$ , which we call the *generation time*.

305 **Motility** is modeled as unbiased diffusion with diffusion constant  $k_D$ . It follows that, in a generation time, the  
306 root-mean-square displacement of an individual in each spatial dimension is  $\sigma_m \equiv \sqrt{2k_D/d}$ , the *scale of motility*.  
307 It can be interpreted as the “typical” distance traveled by an individual during its lifetime. Note that we ignore  
308 that individuals take up space: nothing prevents multiple individuals from being at the same position at the same  
309 time.

310 **Reproduction** is asexual. When an individual reproduces, a new individual is placed at the same position  
311 as the parent. The rate of reproduction of each individual is negatively affected by the level of altruism of the  
312 individual itself and by competition for resources with other individuals; in contrast, it is positively affected by  
313 the altruism of others in its local environment. To implement these effects mathematically, we make use of two  
314 quantities that we will now introduce.

315 First, we define the local population density  $D(\mathbf{y} | \sigma_{rc})$  at position  $\mathbf{y}$  as a conventional Kernel Density Estimate:

$$D(\mathbf{y} | \sigma_{rc}) \equiv \sum_i G_{rc}(\mathbf{x}_i - \mathbf{y} | \sigma_{rc}). \quad (1)$$

316 Here, the summation runs over all individuals  $i$  in the population;  $\mathbf{x}_i$  is the position of individual  $i$ ; and the  
317 kernel function  $G_{rc}(\mathbf{y} | \sigma_{rc})$  is the Gaussian (normal) distribution (univariate or bivariate, depending on the  
318 dimensionality of the habitat) with standard deviation  $\sigma_{rc}$ . By this definition, the population density at position  
319  $\mathbf{y}$  is high if many individuals are found within a distance of order  $\sigma_{rc}$  from  $\mathbf{y}$ . The parameter  $\sigma_{rc}$  is called the  
320 *scale of competition* because, as explained below, it determines the range of competitive interactions.

321 Second, the altruism experienced by an individual at position  $\mathbf{y}$  is measured as

$$A(\mathbf{y} | \sigma_a) \equiv \sum_i \phi_i G_a(\mathbf{x}_i - \mathbf{y} | \sigma_a). \quad (2)$$

322 This is again a KDE, except that each individual  $i$  is weighted by its level of altruism  $\phi_i$ . It is convenient to think  
323 of  $A(\mathbf{y} | \sigma_a)$  as the availability of some public good that organisms secrete locally in proportion to their level  
324 of altruism. The summation in Eq. 2 runs over all individuals, and the contribution of each individual to the  
325 public good at position  $\mathbf{y}$  decreases with their distance to  $\mathbf{y}$  according to a Gaussian kernel function  $G_a$ . The  
326 standard deviation  $\sigma_a$  of the kernel function is referred to as the *scale of altruism* because it determines the range  
327 of altruistic interactions.

328 In terms of these definitions, the full equation for the reproduction rate  $g_i$  of individual  $i$  reads

$$g_i = \max \left[ g_0 \left[ \overbrace{\left( 1 - \underbrace{c \phi_i}_{\text{deficit due to investment in altruism}} + \underbrace{\frac{b_{\max} A(\mathbf{x}_i | \sigma_a)}{b_{\max}/b_0 + A(\mathbf{x}_i | \sigma_a)}}_{\text{advantage due to "public good"}} \right)}^{\text{factor 1}} \right] \left[ \overbrace{\left( 1 - \underbrace{\frac{D(\mathbf{x}_i | \sigma_{rc})}{K}}_{\text{resource competition}} \right)}^{\text{factor 2}} \right], 0 \right]. \quad (3)$$

329 Here,  $g_0$  is the basal reproduction rate. In the subsequent factor (labeled “factor 1”), the term  $-c\phi$  implements a  
 330 deficit in the reproduction rate owing to the individual’s investment in altruism; the parameter  $c$  determines the  
 331 price of altruism. The last term in factor 1 implements the advantage obtained from the altruism of others. The  
 332 advantage grows as  $b_0 A(\mathbf{x} | \sigma_a)$  if  $A(\mathbf{x} | \sigma_a)$  is small but saturates at  $b_{\max}$  if  $A(\mathbf{x} | \sigma_a)$  is large. Factor 2 introduces  
 333 resource competition: it decreases linearly with the local population density  $D(\mathbf{x} | \sigma_{rc})$  such that reproduction is  
 334 locally inhibited when the density approaches  $K$ . (In practice, the population density stabilizes somewhat below  
 335  $K$ , where the average reproductive rate equals the death rate  $d$ .) The  $\max[\cdot]$  function is required because both  
 336 factors 1 and 2 could in rare cases become negative; in that case,  $g_i$  is set to 0.

337 **Heredity and mutation** are implemented as follows. Upon reproduction, the offspring usually inherits  
 338 the value  $\phi$  of the parent, but with probability  $\mu$  a mutation occurs. In that case, the  $\phi$ -value of the offspring  
 339 is determined by adding a random change  $\delta\phi$  to the value of the parent. The absolute value of  $|\delta\phi|$  is drawn  
 340 from an exponential distribution with mean  $m$ , and its sign is positive or negative with equal probability. A  
 341 concern with this procedure, however, is that the resulting trait value  $\phi$  of the offspring can become negative. In  
 342 simulations with a 2D habitat this was not permitted and in such events the value was instead set to 0. Although  
 343 this is a natural choice, it introduces a mutational bias (see Fig. S1), which complicates some of the analyses  
 344 performed on the 1D version of the model (in particular, Fig. 3d,e). In the simulations of the 1D system  $\phi$  was  
 345 therefore allowed to become negative, but the behavior of the individuals was determined by the “effective” value  
 346  $\phi_E = \max(\phi, 0)$  rather than by  $\phi$  itself. In Fig. 3d,e the mean of  $\phi_E$  is plotted. In Fig. 3a the colony mean of  $\phi$  is  
 347 plotted, but the distinction is immaterial because in this window of the simulation negative values of  $\phi$  are rare.

### 348 Units and parameter reduction

349 We are free to choose convenient units for length, time, and the trait  $\phi$ ; thus, three parameters can be eliminated.  
 350 First, we choose the unit of length such that the scale of altruism  $\sigma_a$  equals 1 by definition. The two other  
 351 length scales that exist in the model,  $\sigma_{rc}$  and  $\sigma_m$ , are therefore expressed relative to  $\sigma_a$ . Second, units of time  
 352 are chosen such that the generation time  $d^{-1}$  is 1. This implies that the death rate  $d$  also equals 1 by definition.  
 353 Third, the unit of the trait value  $\phi$  is chosen such that the parameter  $c$  (see Eq. 3) equals 1. This simplifies the  
 354 interpretation of  $\phi$ : an individuals with trait value  $\phi$  directly sacrifices a fraction  $\phi$  of its basal reproductive rate  
 355 to the public good. Note, however, that the summation in Eq. 2 runs over *all* individuals, so that each individual  
 356 also benefits from its *own* altruism. In the literature, a distinction is sometimes made between soft and hard



357 altruism, depending on whether the direct benefits that altruists reaps from their behavior outweigh the direct  
358 costs [38]. We always choose parameters such that the direct costs far exceed the direct benefits, modeling hard  
359 altruism. The contribution of individual  $i$  to the public good  $A(\mathbf{x}_i|\sigma_a)$  at its own position  $\mathbf{x}_i$  is given by

$$\phi_i G_a(\mathbf{0} | \sigma_a) = \begin{cases} \frac{\phi_i}{\sqrt{2\pi}\sigma_a} & \text{in the 1D habitat,} \\ \frac{\phi_i}{2\pi\sigma_a^2} & \text{in the 2D habitat.} \end{cases} \quad (4)$$

360 From Eq. 3 and the fact that  $\sigma_a = 1$  by definition, it then follows that the reproductive advantage due to one's  
361 own altruism is bounded by  $b_0\phi_i/\sqrt{2\pi}$  (in the 1D habitat) or  $b_0\phi_i/(2\pi)$  (in the 2D habitat). This reproductive  
362 advantage cannot outweigh the deficit of  $c\phi_i = \phi_i$  unless  $b_0 > \sqrt{2\pi}$  (in the 1D case) or  $b_0 > 2\pi$  (in the 2D case);  
363 we steer clear of this regime by choosing  $b_0$  appropriately small.

## 364 4.2 Implementation of the simulations

### 365 Simulation scheme

366 In the simulations, continuous space is approximated by a linear grid (in the 1D habitat) or a square grid (in the  
367 2D habitat) with grid cells of linear size  $\delta x$ . Periodic boundary conditions are imposed. Time is divided into  
368 computational time steps  $\delta t$ .

369 During each computational time step, the state of the system at time  $t + \delta t$  is constructed based on the state  
370 at time  $t$  by the following sequence of steps:

371 **Step 1. Calculate reproduction rates** First, the density  $D(\mathbf{x}|\sigma_{rc})$  and the availability of public good  $A(\mathbf{x}|\sigma_a)$   
372 at each position  $\mathbf{x}$  are computed, taking into account the periodic boundary conditions. After this, the  
373 reproduction rates  $g_i$  of all individuals can be calculated.

374 **Step 2. Reproduction and mutation** Each individual  $i$  in the field reproduces with probability  $g_i\delta t$ . The  
375 offspring is mutated with probability  $\mu$ , as described above.

376 **Step 3. Death** Each individual subsequently dies with probability  $d\delta t$ .

377 **Step 4. Motility** Each individual is displaced in each spatial dimension by a distance drawn at random from a  
378 discrete approximation of a Gaussian distribution with mean 0 and standard deviation  $\sqrt{2k_D\delta t}$ .

### 379 Initial conditions

380 The steady-state population density of a population of defectors ( $\phi_i = 0$ ) is approximately  $(1 - d/g_0)K$ , which can  
381 be derived by solving  $g_i = d$  under the assumption of a homogeneous population distribution. Therefore, the  
382 initial condition was constructed by placing  $(1 - d/g_0)KL$  (in the 1D habitat) or  $(1 - d/g_0)KL^2$  (in the 2D habitat)  
383 defectors at uniformly random positions, where  $L$  is the linear size of the habitat.

## 384 **Default parameters**

385 The default values of biological parameters are listed in Table 1. Here, we also provide the computational  
386 parameters.

387 For simulations of the 2D model, a square habitat of linear size  $L = 102.4$  was used; using  $\delta x = 0.1$  this  
388 amounted to  $\approx 10^6$  grid cells. Using the default parameter values  $K = 40$  and  $g_0 = 5$ , the total population size  
389 was approximately  $n = (1 - d/g_0)KL^2 \approx 3.4 \times 10^5$ . The simulations were run for  $T = 8\,000$  generations, with time  
390 steps  $\delta t = 0.08$ .

391 For simulations of the 1D model, a habitat of size  $L = 819.2$  was used with  $\delta x = 1/80$ , resulting in 65 536  
392 grid cells. Using the default parameter values  $K = 100$  and  $g_0 = 5$ , the total population size was approximately  
393  $(1 - d/g_0)KL \approx 6.6 \times 10^4$ . These simulations were run for  $T = 160\,000$  generations, again with time steps  $\delta t = 0.08$ .

394 Additional settings were used to calibrate the automated recognition of colonies; see below.

## 395 **4.3 Computational procedures**

### 396 **Calculating cumulative effects of selection, drift, and mutational bias**

397 The mathematical framework used to quantify selection, drift and mutational bias is described in Appendix A.2.  
398 We applied this calculation to each time step of the simulations, so that the cumulative effect of each of the  
399 evolutionary forces could be tracked (Fig. 2a and S1).

400 For the analysis we need to obtain, for each individual  $i$  present right before the computational time step,  
401 the expectation value  $E(W_i)$  of the number of offspring  $W_i$  it will have after the time step (also counting the  
402 individual itself if it survives). To do so, first the growth rate  $g_i$  was calculated and subsequently the reproduction  
403 and death probabilities  $P_r = g_i\delta t$  and  $P_d = d\delta t$  over this time step. From the simulation scheme (see above) the  
404 expectation value can then be derived:

$$E(W_i) = (1 + P_r)(1 - P_d). \quad (5)$$

405 This expression is used in the calculations.

406 We note that this expectation value is conditioned on the current state of the simulation, in particular the  
407 population density and availability of public good at the position of the individual. In other words, only the  
408 effects of the inherent randomness of reproduction and death given the state of the local neighborhood are  
409 accounted as random drift; the fact that the state of the local neighborhood itself is also affected by random  
410 events in the past, such as the stochastic motility and demographics of others, is not. (See also Appendix A.2.)

### 411 **Calculating the local population density**

412 To efficiently calculate the local population density (Kernel Density Estimate or KDE)  $D(\mathbf{x}|\sigma_{rc})$  (Eq. 1), first a  
413 matrix was constructed that specifies, for each position in the habitat, the number of individuals at that position.  
414 The KDE at each position, taking into account the periodic boundary conditions, is the circular convolution of  
415 this occupancy matrix with the periodic summation of the (discretized approximation of the) Gaussian kernel  
416  $G_{rc}(\mathbf{x}|\sigma_{rc})$ . To perform this convolution, we use the Circular Convolution Theorem, which states that the circular

417 convolution of two matrices can be obtained by first calculating their Discrete Fourier Transform (DFT) and then  
418 calculating the inverse DFT of their element-wise product.

#### 419 **Calculating the availability of public good**

420 The public good available at each position,  $A(x|\sigma_a)$ , is calculated in a similar way. First a matrix is constructed  
421 that contains, for each position in the habitat, the sum of the trait values of all individuals present at that position.  
422 The value of  $A(x|\sigma_a)$  for each position is now obtained as the convolution of this matrix with the (discretized  
423 approximation of the) Gaussian kernel  $G_a(x|\sigma_a)$ , again using the Circular Convolution Theorem.

#### 424 **Calculating the radial distribution function**

425 The radial distribution function or pair-correlation function  $g(r)$  is defined as the *observed* number of pairs of  
426 individuals separated by a distance  $r$ , relative to the *expected* number under the null model assuming that each  
427 individual is placed at a random position.

428 In the 1D case, the distance  $r$  can only take on values  $k\delta x$ , where  $k$  is a non-negative integer. Call the  
429 population size  $n$  and the size of the habitat in grid cells  $X$ . To calculate the expected number of pairs at distance  
430  $r = k\delta x$ , written as  $E(r)$ , we note that the number of individuals  $o_x$  at position  $x$  is binomially distributed under  
431 the null model. Its expectation value is  $E[o_x] = n/X$  and hence  $E(r) = \sum_{x=0}^{X-1} E[o_x o_{(x+k \bmod n)}] \approx n^2/X$ . (Here, we  
432 used that the occupancies of different sites are to good approximation independent.) The observed number of  
433 pairs of individuals found at a distance  $r = k\delta x$ , called  $O(r)$ , is precisely given by the auto-correlation of the  
434 occupancy matrix, which is again efficiently calculated using the Circular Convolution Theorem. For each value  
435  $r = k\delta x$ , the radial distribution function is then obtained as  $g(r) = O(r)/E(r)$ .

436 In the 2D case, the rectangular grid imposes that  $r$  can only take on values such that  $r^2 = (a^2 + b^2)\delta x^2$ , where  
437  $a$  and  $b$  are integers. In addition, in calculating the expectation under the null model, the frequency  $F(r)$  with  
438 which each distance occurs in the grid has to be taken into account. (E.g., the distance  $5\delta x$  occurs three times  
439 more often than the distance  $6\delta x$ .) Under the same assumptions as made for the 1D case, the expectation is  
440  $E(r) = F(r)n^2/X^2$ . To calculate the observed number of pairs  $O(r)$ , the auto-correlation matrix of the occupancy  
441 matrix is used. Then  $g(r) = O(r)/E(r)$  is calculated for each admissible value of  $r$ . To obtain plot Fig. 2c, the  
442 distances were subsequently binned.

#### 443 **Calculating the terms of MLS 1 and MLS 2**

444 To obtain Fig 4 and S3, we divided the simulation into 2 000 time intervals of  $\Delta t = 80$  generations and applied  
445 the analyses of MLS 1 and 2 to each time interval. The mathematical expressions for MLS 1 and 2 are briefly  
446 summarized in Appendix A.4. Here follows a description of the computational methods used.

447 For concreteness, let us focus on a particular interval  $(t_1, t_2]$ . The first step is to calculate the selection  
448 differential  $S$ , defined as the covariance of  $\phi$  and relative fitness  $w$  (Eq. A.2 in Appendix A.1). For the purpose of  
449 this analysis, the relative fitness  $w_i$  of an individual  $i$  living at time  $t_1$  is the number of offspring it has at time  $t_2$   
450 (the absolute fitness  $W_i$ ), divided by the population mean  $\bar{W}$ . To find these offspring numbers, each individual at  
451 time  $t_1$  was assigned a unique ID that was subsequently inherited by all offspring. At time  $t_2$ , a frequency table

452 of ID values was constructed, which directly provided the fitness of each individual at time  $t_1$ . With this  
453 information,  $S$  can be calculated directly.

454 The analysis of MLS 1 splits  $S$  into two parts (see Eq. A.8 in Appendix A.3). It is sufficient to calculate the  
455 second term,  $S_{\text{among}}$ , after which the first follows as  $S_{\text{within}} = S - S_{\text{among}}$ . To calculate  $S_{\text{among}}$  first the geographical  
456 borders of all colonies at time  $t_1$  were identified; the algorithm used for this is described in the next section. Next,  
457 each individual at  $t_1$  was assigned to a colony. Then for each colony  $j$  we calculated its population size  $n_j$ , its  
458 mean relative fitness  $\{w|j\}_w$  and its mean trait value  $\{\phi|j\}_w$ . At this point,  $S_{\text{among}}$  could be calculated from its  
459 definition.

460 The analysis of MLS 2 describes the dynamics from the perspective of the colonies (see Eq. A.9). To determine  
461 the fitness of the colonies present at time  $t_1$ , we had to count how many offspring *colonies* they have at time  $t_2$ .  
462 This requires that we defined the borders between the colonies at time  $t_2$ , but also that we traced the ancestor  
463 colony at  $t_1$  for each offspring colony at  $t_2$ ; the algorithm used is described in the next section. The other  
464 ingredient of Eq. A.9 is the trait value  $\Phi$  of the colonies. Because  $\Phi_j = \{\phi|j\}_w$  (see section A.4), these quantities  
465 were already calculated for MLS 1 and both terms of Eq. A.9 can be evaluated directly.

#### 466 **Automated recognition and tracking of colonies**

467 To perform the multilevel selection analysis, the simulation had to automatically recognize colonies and track  
468 their ancestry. Because existing clustering algorithms are inefficient for 1D systems and/or difficult to adjust to  
469 our needs, we used our own heuristics.

470 Where to draw the border between neighboring colonies, and when to conclude that one colony has divided  
471 into two, is to some degree arbitrary. The results of the analyses, however, do not depend sensitively on such  
472 details as long as we use reasonable definitions and apply them consistently.

473 The basic idea is to identify the borders between colonies with local minima of the population density.  
474 However, local minima can also occur temporarily within colonies due to random fluctuations, and such minima  
475 should not be confused with true borders between colonies. To solve this, one might exclude local minima if  
476 the density at their position exceeds a set threshold, so that only “deep” minima are considered. Such a simple  
477 threshold rule can identify most colonies correctly, but issues arise during the binary fission of colonies. During  
478 this process the depth of the local minimum that separates the two daughter colonies fluctuates, and hence it is  
479 likely to cross the threshold multiple times. Consequently, the threshold rule tends to record multiple events of  
480 fission and fusion during a single process of colony division. Similarly, when a dwindling colony is about to  
481 disappear, the threshold rule tends to infer series of deaths and resurrections of the same colony.

482 To prevent this, the algorithm that was used in the simulations in fact uses two density thresholds: a low and  
483 a high one,  $T_{\text{low}}$  and  $T_{\text{high}}$ . When a new local minimum appears, a new border (and hence the birth of a new  
484 colony) is inferred only when the local density at the minimum drops below  $T_{\text{low}}$ . In contrast, when an existing  
485 border is about to disappear, this is acknowledged only when the density at the associated local minimum rises  
486 above  $T_{\text{high}}$ . The result is a hysteresis of sorts: when the density of at new minimum drops below  $T_{\text{low}}$  for the first  
487 time, a colony is born; if afterwards the density at the border temporarily exceeds  $T_{\text{low}}$ , the border is maintained  
488 unless it also exceeds  $T_{\text{high}}$ .

489 To be precise, when performing the MLS analysis on the interval  $(t_1, t_2]$ , the borders of the colonies at time  $t_2$   
490 were constructed as follows:

- 491 1. Calculate a smoothed density. The smoothed density at each position was defined as a KDE with bandwidth  
492  $\sigma_a/2$ , taking into account the periodic boundary conditions.
- 493 2. Identify local minima. If the smoothed density at grid point  $x$  is written as  $\rho_x$ , each  $x$  such that  $\rho_x < \rho_{x+1}$   
494 and  $\rho_x < \rho_{x-1}$  marks a local minimum. (Because of the periodic boundary conditions, all indices should be  
495 read modulo  $X$ , the size of the grid.)
- 496 3. Determine *tentative* borders between colonies. First, local minima were selected with a density  $\rho_x < T_{\text{high}}$ ;  
497 the other minima were discarded. Each of the selected minimal was then associated with a tentative  
498 border which would later be further scrutinized. To ensure that no individuals can sit exactly at a border  
499 (causing ambiguity as to which colony it belongs to), borders were positioned *between* grid points. First, the  
500 derivative of the density at the position of each minimum was approximated as  $\rho'(x) = (\rho_{x+1} - \rho_{x-1})/(2\delta x)$ .  
501 If a minimum was located at grid point  $x$ , then a tentative border was placed at  $x + 1/2$  if the derivative  
502 was negative, and at  $x - 1/2$  if the derivative was positive.
- 503 4. Assign an ancestor to each tentative colony. Given the tentative borders, tentative colonies were also  
504 implicitly. For each tentative colony at time  $t_2$  an ancestor colony at time  $t_1$  was determined. To do so,  
505 we exploited that we have already traced back the ancestry of the *individuals* in the colonies. We then  
506 used the expectation that the ancestor colony  $P$  of a colony  $Q$  contains most, if not all, ancestors of the  
507 *individuals* that belong to  $Q$ . Based on this, we identified  $P$  as the ancestor colony that contains the largest  
508 fraction of the ancestors of the individuals belonging to  $Q$ .
- 509 5. Reject tentative borders that reflect fluctuations or incomplete divisions. If the colonies on either side of a  
510 tentative border had the same ancestral colony, this suggested that a colony division might have taken  
511 place. In this case, we compared the density at the corresponding minimum to the low threshold  $T_{\text{low}}$ ;  
512 if the density was above that threshold, the border was rejected. All other tentative borders were now  
513 accepted, so that the identification of colonies at  $t_2$  and their ancestor at time  $t_1$  also became final.
- 514 6. Count the number of offspring of each ancestral colony. Because the ancestors of colonies at time  $t_2$  had  
515 been identified, the number of offspring—the absolute fitness—of each ancestral colony could be tabulated.  
516 If an ancestral colony had fitness 0, it must have died between  $t_1$  and  $t_2$ . If an ancestral colony had absolute  
517 fitness  $> 1$  it must have divided. (In practice, a fitness above 2 did not occur because  $\Delta t$  is too short to  
518 support multiple consecutive divisions.) If a colony had fitness 1, the ancestral colony most likely survived  
519 the time interval without reproducing.

520 The thresholds  $T_{\text{high}}$  and  $T_{\text{low}}$  are parameters; we found that  $T_{\text{high}} = 0.7K$  and  $T_{\text{low}} = 0.2K$  worked well.

## 521 **Estimating the lattice constant of the hexagonal lattice by counting colonies**

522 The lattice constant of the hexagonal pattern that emerges in the 2D model can be estimated by counting the  
523 number of colonies in the habitat. A hexagonal lattice is composed of equilateral triangles with side  $a$  and area

524  $\sqrt{3}a^2/2$ . The number of triangles is twice the number of nodes  $\nu$ . In a large enough habitat of area  $L^2$ , the number  
525 of nodes can then be estimated as  $\nu \approx L^2/(\sqrt{3}a^2)$ . Conversely, after counting the number of nodes,  $a$  can be  
526 estimated as  $a \approx L\sqrt{2/(\sqrt{3}\nu)}$ . At the end of the simulations of Fig. 2 we find approximately 179 colonies, which,  
527 given  $L = 102.4$ , corresponds to  $a \approx 8.2$ . This is consistent with the estimate based on the radial distribution  
528 function (Fig. 2c).

### 529 **Estimating error bars**

530 In the Results section and Table S1 we provide 95% confidence intervals for the means of all quantities plotted  
531 in Figs. 4 and S3. Because data points in these time series are auto-correlated and the distributions of some  
532 quantities are skewed, the standard methods for calculating confidence intervals could not be used. Therefore,  
533 we applied the method described in Ref. [53].

534 Briefly, the idea is to divide the data series into blocks of length  $l$  and use the means of these blocks (rather than  
535 the original data points) to estimate the standard error of the mean (SEM). Starting with  $l = 2$ , if  $l$  is increased,  
536 the correlations between block means eventually become negligible and the estimates stabilize around a sensible  
537 value, which we determined by manual inspection and then rounded off conservatively. Moreover, because of  
538 the central limit theorem, the distribution of block means converges to a normal distribution, which justifies  
539 the use of  $t$ -statistics to estimate confidence intervals. Although the correct number of degrees of freedom to  
540 be used is poorly constrained (as it depends on the minimal value of  $l$  that is deemed large enough to remove  
541 correlations), it is in all cases large enough to ensure that the critical  $t$ -value for  $t_{0.05(2)}$  is near 2. We therefore  
542 estimated the 95% confidence interval as the sample mean  $\pm$  twice the estimated SEM.

### 543 **Software**

544 Simulations were performed with custom software written in Fortran; the code is made available on the follow-  
545 ing GitHub repository: <https://github.com/rutgerhermsen/altruism.git>. Statistics were  
546 performed in R version 3.6.1. Visualization was done in R, using `ggplot2`, and in Wolfram Mathematica 12.

## 547 **5 Acknowledgments**

548 I am grateful to Rens Dijkhuizen for preliminary simulations and analysis, and to Hilje Doekes for many insightful  
549 discussions and valuable feedback. This work was supported by the Human Frontier Science Program, grant nr.  
550 RGY0072/2015 (<http://www.hfsp.org/funding/research-grants>).

## 551 **References**

- 552 1. Frank, S. A. *Foundations of Social Evolution* (Princeton University Press, Princeton, 1998).
- 553 2. Marshall, J. A. R. *Social Evolution and Inclusive Fitness Theory : An Introduction* (Princeton University Press,  
554 Princeton, 2015).
- 555 3. Nowak, M. A. Five Rules for the Evolution of Cooperation. *Science* **314**, 1560–1563 (Dec. 8, 2006).
- 556 4. Cremer, J. *et al.* Cooperation in Microbial Populations: Theory and Experimental Model Systems. *Journal*  
557 *of Molecular Biology. Underlying Mechanisms of Bacterial Phenotypic Heterogeneity and Sociobiology* **431**,  
558 4599–4644 (Nov. 22, 2019).
- 559 5. Kerr, B., Godfrey-Smith, P. & Feldman, M. W. What Is Altruism? *Trends in Ecology & Evolution* **19**, 135–140  
560 (Mar. 1, 2004).
- 561 6. West, S. A., Griffin, A. S. & Gardner, A. Social Semantics: Altruism, Cooperation, Mutualism, Strong  
562 Reciprocity and Group Selection. *Journal of Evolutionary Biology* **20**, 415–432 (Mar. 2007).
- 563 7. Hamilton, W. D. The Evolution of Altruistic Behavior. *The American Naturalist* **97**, 354–356 (Sept. 1, 1963).
- 564 8. Sober, P. E., Wilson, P. D. S. & Wilson, D. S. *Unto Others: The Evolution and Psychology of Unselfish Behavior*  
565 New edition. 416 pp. (Harvard University Press, Cambridge, Mass., Oct. 1, 1999).
- 566 9. Fletcher, J. A. & Doebeli, M. A Simple and General Explanation for the Evolution of Altruism. *Proceedings of*  
567 *the Royal Society of London B: Biological Sciences* **276**, 13–19 (Jan. 7, 2009).
- 568 10. Levin, B. R. & Kilmer, W. L. Interdemic Selection and the Evolution of Altruism: A Computer Simulation  
569 Study. *Evolution* **28**, 527–545 (1974).
- 570 11. Wilson, D. S. A Theory of Group Selection. *Proceedings of the national academy of sciences* **72**, 143–146  
571 (1975).
- 572 12. Wilson, D. S. The Group Selection Controversy: History and Current Status. *Annu. Rev. Ecol. Syst.* **14**,  
573 159–187 (Nov. 1983).
- 574 13. Okasha, S. *Evolution and the Levels of Selection* (Oxford University Press, 2006).
- 575 14. Traulsen, A. & Nowak, M. A. Evolution of Cooperation by Multilevel Selection. *PNAS* **103**, 10952–10955  
576 (July 18, 2006).
- 577 15. Black, A. J., Bourrat, P. & Rainey, P. B. Ecological Scaffolding and the Evolution of Individuality. *Nat Ecol*  
578 *Evol* **4**, 426–436 (3 Mar. 2020).
- 579 16. Hamilton, W. D. The Genetical Evolution of Social Behaviour. I. *Journal of theoretical biology* **7**, 1–16 (1964).
- 580 17. Grafen, A. A Geometric View of Relatedness. *Oxford surveys in evolutionary biology* **2**, 28–89 (1985).
- 581 18. Nowak, M. A. & May, R. M. Evolutionary Games and Spatial Chaos. *Nature* **359**, 826–829 (1992).
- 582 19. Taylor, P. D. Altruism in Viscous Populations — an Inclusive Fitness Model. *Evol Ecol* **6**, 352–356 (July 1,  
583 1992).

- 584 20. Wilson, D. S., Pollock, G. B. & Dugatkin, L. A. Can Altruism Evolve in Purely Viscous Populations? *Evol*  
585 *Ecol* **6**, 331–341 (July 1, 1992).
- 586 21. Queller, D. C. Does Population Viscosity Promote Kin Selection? *Trends in Ecology & Evolution* **7**, 322–324  
587 (Oct. 1, 1992).
- 588 22. West, S. A. Cooperation and Competition Between Relatives. *Science* **296**, 72–75 (Apr. 5, 2002).
- 589 23. Wallace, B. Hard and Soft Selection Revisited. *Evolution* **29**, 465–473 (1975).
- 590 24. Goodnight, C. J., Schwartz, J. M. & Stevens, L. Contextual Analysis of Models of Group Selection, Soft  
591 Selection, Hard Selection, and the Evolution of Altruism. *The American Naturalist* **140**, 743–761 (1992).
- 592 25. Mitteldorf, J. & Wilson, D. S. Population Viscosity and the Evolution of Altruism. *Journal of Theoretical*  
593 *Biology* **204**, 481–496 (June 2000).
- 594 26. Queller, D. C. Genetic Relatedness in Viscous Populations. *Evolutionary Ecology* **8**, 70–73 (Jan. 1994).
- 595 27. Wilson, R. L., Urbanowski, M. L. & Stauffer, G. V. DNA Binding Sites of the LysR-Type Regulator GcvA in  
596 the Gcv and gcvA Control Regions of Escherichia Coli. *Journal of bacteriology* **177**, 4940–4946 (1995).
- 597 28. Chuang, J. S., Rivoire, O. & Leibler, S. Simpson’s Paradox in a Synthetic Microbial System. *Science* **323**,  
598 272–275 (Jan. 9, 2009).
- 599 29. Cremer, J., Melbinger, A. & Frey, E. Growth Dynamics and the Evolution of Cooperation in Microbial  
600 Populations. *Scientific Reports* **2** (Feb. 21, 2012).
- 601 30. Hardin, G. The Tragedy of the Commons. *Science* **162**, 1243–1248 (Dec. 13, 1968).
- 602 31. Colizzi, E. S. & Hogeweg, P. High Cost Enhances Cooperation through the Interplay between Evolution and  
603 Self-Organisation. *BMC Evolutionary Biology* **16**, 31 (Feb. 1, 2016).
- 604 32. Wakano, J. Y., Nowak, M. A. & Hauert, C. Spatial Dynamics of Ecological Public Goods. *PNAS* **106**, 7910–7914  
605 (May 12, 2009).
- 606 33. Turing, A. M. The Chemical Basis of Morphogenesis. *Philosophical Transactions of the Royal Society of*  
607 *London. Series B, Biological Sciences* **237**, 37–72 (1952).
- 608 34. Price, G. R. Extension of Covariance Selection Mathematics. *Ann. Hum. Genet.* **35**, 485–490 (Apr. 1972).
- 609 35. Damuth, J. & Heisler, I. L. Alternative Formulations of Multilevel Selection. *Biol Philos* **3**, 407–430 (Oct. 1,  
610 1988).
- 611 36. Price, G. R. Selection and Covariance. *Nature* **227**, 520–521 (Aug. 1, 1970).
- 612 37. Frank, S. A. Natural Selection. IV. The Price Equation. *J Evol Biol* **25**, 1002–1019 (June 2012).
- 613 38. Wilson, D. S. Structured Demes and Trait-Group Variation. *The American Naturalist* **113**, 606–610 (Apr.  
614 1979).
- 615 39. Boerlijst, M. C. & Hogeweg, P. Spiral Wave Structure in Pre-Biotic Evolution: Hypercycles Stable against  
616 Parasites. *Physica D: Nonlinear Phenomena* **48**, 17–28 (Feb. 1, 1991).



- 617 40. De Jager, M., Weissing, F. J. & van de Koppel, J. Why Mussels Stick Together: Spatial Self-Organization  
618 Affects the Evolution of Cooperation. *Evol Ecol* **31**, 547–558 (Aug. 2017).
- 619 41. Van Ballegooijen, W. M. & Boerlijst, M. C. Emergent Trade-Offs and Selection for Outbreak Frequency in  
620 Spatial Epidemics. *Proc Natl Acad Sci U S A* **101**, 18246–18250 (Dec. 28, 2004).
- 621 42. Takeuchi, N. & Hogeweg, P. Multilevel Selection in Models of Prebiotic Evolution II: A Direct Comparison  
622 of Compartmentalization and Spatial Self-Organization. *PLoS Comput Biol* **5**, e1000542 (Oct. 2009).
- 623 43. Rietkerk, M. & van de Koppel, J. Regular Pattern Formation in Real Ecosystems. *Trends in Ecology & Evolution*  
624 **23**, 169–175 (Mar. 1, 2008).
- 625 44. Nowak, M. A., Tarnita, C. E. & Wilson, E. O. The Evolution of Eusociality. *Nature* **466**, 1057–1062 (Aug. 26,  
626 2010).
- 627 45. Abbot, P. *et al.* Inclusive Fitness Theory and Eusociality. *Nature* **471**, E1–E4 (7339 Mar. 2011).
- 628 46. Strassmann, J. E., Page, R. E., Robinson, G. E. & Seeley, T. D. Kin Selection and Eusociality. *Nature* **471**,  
629 E5–E6 (7339 Mar. 2011).
- 630 47. Queller, D. C. Kin Selection and Its Discontents. *Philosophy of Science* **83**, 861–872 (Dec. 2016).
- 631 48. Levin, S. R. & Grafen, A. Inclusive Fitness Is an Indispensable Approximation for Understanding Organismal  
632 Design. *Evolution* **73**, 1066–1076 (2019).
- 633 49. Goodnight, C. J. Contextual Analysis and Group Selection. *Behavioral and Brain Sciences* **17**, 622 (1994).
- 634 50. Doekes, H. M. & Hermsen, R. Multiscale Selection in Spatially Structured Populations. (*to be submitted to*  
635 *bioRxiv*).
- 636 51. Rice, S. H. *Evolutionary Theory: Mathematical and Conceptual Foundations* 370 pp. (Sinauer Associates, 2004).
- 637 52. Waters, C. K. Okasha's Unintended Argument for Toolbox Theorizing. *Philosophy and Phenomenological*  
638 *Research* **82**, 232–240 (2011).
- 639 53. Flyvbjerg, H. & Petersen, H. G. Error Estimates on Averages of Correlated Data. *The Journal of Chemical*  
640 *Physics* **91**, 461–466 (July 1989).
- 641 54. Brandon, R. N. Adaptation and Evolutionary Theory. *Studies in History and Philosophy of Science Part A* **9**,  
642 181–206 (Sept. 1, 1978).
- 643 55. Mills, S. K. & Beatty, J. H. The Propensity Interpretation of Fitness. *Philosophy of Science* **46**, 263–286 (June  
644 1979).

## 645 Appendices

### 646 A The Price equation, evolutionary forces, and MLS 1 & 2

647 In this article, several mathematical results are applied that have been derived long ago [13, 34, 35]. For ease of  
648 reference and to facilitate readers who are not intimately familiar with this theory, we here briefly summarize  
649 these results. Nothing in this section is new, although our notation differs somewhat from other presentations  
650 to expose the analogies between the *multilevel* selection analysis presented here and the *multiscale* analysis  
651 presented elsewhere [50].

#### 652 A.1 The Price equation

653 The Price equation provides a general way to formally describe changes in gene frequencies or mean trait values  
654 in evolving populations due to evolutionary forces such as selection and mutation [34, 36, 51].

655 In its simplest form we envision a population of entities that each possess a numerical trait  $\phi$ . At time  $t_1$ , the  
656 population size is  $n$ , and the population mean of  $\phi$  is  $\bar{\phi}$ . At a later time  $t_2 = t_1 + \Delta t$  the mean of  $\phi$  has changed by  
657 an amount  $\Delta\bar{\phi}$ . Each individual alive at time  $t_2$  has a unique ancestor at time  $t_1$ . (If the individual was already  
658 born at time  $t_1$ , we designate its past self as the ancestor.) Conversely, each individual  $i$  alive at time  $t_1$  has  $W_i$   
659 offspring at time  $t_2$ . (If the individual is itself still alive at time  $t_2$ , it is counted as one of the offspring.)  $W_i$  is  
660 called the absolute fitness of  $i$ . The relative fitness  $w_i$  of this individual is defined as  $w_i = W_i/\bar{W}$ , where  $\bar{W}$  is the  
661 population mean absolute fitness. The trait value  $\phi$  of the offspring of  $i$  differs from the value of individual  $i$   
662 itself; the average difference among  $i$ 's offspring is called  $\Delta\phi_i$ .

663 With these definitions, the change in the mean value of  $\phi$  over the time interval  $\Delta t$  can be written as:

$$\Delta\bar{\phi} = S + T, \tag{A.1}$$

with

$$S = \text{Cov}(\phi, w) = \overline{\phi w} - \bar{\phi}\bar{w}, \tag{A.2}$$

$$T = \overline{w\Delta\phi}. \tag{A.3}$$

664 Equation A.1 is called the Price equation. The first term,  $S$ , is the population covariance between the trait and  
665 relative fitness. It shows that the mean value of  $\phi$  tends to increase if a high value of  $\phi$  is associated with a  
666 high fitness. Therefore,  $S$  is often considered a measure of the effect of natural selection and called the selection  
667 differential. The second term,  $T$ , is the average change in trait value between ancestors and their offspring.  
668 Therefore  $T$  is a measure of transmission bias.

#### 669 A.2 Measuring selection, random drift, and mutational bias

670 Although the Price equation is frequently and fruitfully used in its standard form, it has its limitations. One clear  
671 limitation is that it does not acknowledge one of the evolutionary forces that is central to canonical evolutionary

672 theory: random drift.

673 The absence of random drift from the standard Price equation is a consequence of the definition of fitness  
674 used in its formulation. Above, the fitness  $W_i$  of individual  $i$  was defined as the actual number of offspring it  
675 has after the time interval  $\Delta t$ . This is at odds with the usual parlance, in which fitness refers to an organism's  
676 adaptedness to a particular environment. If an organism dies without offspring, this does not necessarily prove  
677 that it was poorly adapted to its environment: it might just have been unlucky. The term fitness, then, seems  
678 to refer more properly to a propensity or expectation than to an actually realized number of offspring [54, 55].  
679 Deviations from the expectation due to chance are the source of what is usually called random drift.

680 One way to extend the Price equation is therefore to treat that the number of offspring  $W_i$  as a random  
681 variable and to associate fitness with its expectation value  $E(W_i)$  [13, 51]. In that case we can write the actual  
682 number of offspring  $W_i$  as  $E(W_i) + \delta W_i$ , where  $\delta W_i$  is the deviation from the expectation. If we insert this into  
683 the standard Price equation (Eq. A.1) we arrive at

$$\Delta \bar{\phi} = \underbrace{\text{Cov}(\phi, E(W)/\bar{W})}_{\text{selection}} + \underbrace{\text{Cov}(\phi, \delta W/\bar{W})}_{\text{drift}} + \underbrace{\overline{w\Delta\phi}}_{\text{transmission}}. \quad (\text{A.4})$$

684 Compared to the standard Price equation, the selection differential  $S$  is split into two parts: one part that more  
685 properly captures the effects of natural selection, and one term that formalizes random drift.

686 A complication with the above formulation is that it is not obvious how the probability distribution of  $W_i$ ,  
687 and hence the expectation  $E(W_i)$ , should be defined. In particular, it is unclear which variables other than the  
688 trait value  $\phi$  should be taken into account — that is, which information the probability distribution should be  
689 conditioned on. The more information we incorporate into the expectation, the less uncertainty remains to  
690 power random drift. Clearly, this difficult issue is beyond the scope of this work. In the meantime, we take a  
691 pragmatic stance: Through convenient choices, the above formalism can be used to examine the contributions of  
692 elected sources of randomness, regardless of whether these choices can be justified based on unique “correct”  
693 definitions of fitness, selection, and random drift.

### 694 A.3 Multilevel selection 1

695 Next, we consider a population that is subdivided into  $N$  distinct groups. To describe the system from the  
696 perspective of MLS 1, we start with the Price equation at the level of the individuals, Eq. A.1. The idea of the  
697 analysis is to split the selection differential  $S$  into two parts,  $S_{\text{within}}$  and  $S_{\text{among}}$ , where the first accounts for  
698 selection taking place *within* groups, and the second for selection *among* groups. We saw that  $S$  is defined as a  
699 covariance (Eq. A.2); mathematically, the decomposition is a direct application of the Law of Total Covariance. In  
700 the interest of clarity will nevertheless rederive it from scratch.

701 It will be useful to introduce some notation. Let  $z$  be a trait or property of individuals. We will denote the  
702 value of  $z$  of individual  $i$  in group  $j$  as  $z_{ij}$ , and the size of group  $j$  will be written  $n_j$ . Then the mean of  $z$  within  
703 group  $j$  is written as  $\{z|j\}_w$ :

$$\{z|j\}_w \equiv \frac{\sum_{i=1}^{n_j} z_{ij}}{n_j}. \quad (\text{A.5})$$

704 The label “w” stands for “within”. Whenever this does not give rise to confusion we will omit the group index  $j$   
 705 and write  $\{z\}_w$ .

706 Now, let  $u$  be a trait or property of groups. Then we define  $\langle u \rangle_a$  as the mean of  $u$  among groups, where the  
 707 groups are weighted according to their group size  $n_j$ :

$$\langle u \rangle_a = \frac{\sum_{j=1}^N n_j u_j}{n}. \quad (\text{A.6})$$

708 The label “a” stands for “among”.

709 From the above definitions, one can verify that

$$\langle \{z\}_w \rangle_a = \bar{z}. \quad (\text{A.7})$$

710 That is to say, if we know the mean value of  $z$  within each group,  $\{z\}_w$ , we can recover the population mean  $\bar{z}$   
 711 by averaging the over all groups, provided we give larger groups a larger weight.

With the above notation and Eq. A.7 in place, the decomposition of  $S$  is obtained quite directly:

$$\begin{aligned} S = \text{Cov}(\phi, w) &= \overline{\phi w} - \bar{\phi} \bar{w} \\ &= \langle \{\phi w\}_w \rangle_a - \langle \{\phi\}_w \rangle_a \langle \{w\}_w \rangle_a \\ &= \langle \{\phi w\}_w \rangle_a - \langle \{\phi\}_w \{w\}_w \rangle_a + \langle \{\phi\}_w \{w\}_w \rangle_a - \langle \{\phi\}_w \rangle_a \langle \{w\}_w \rangle_a \\ &= \langle \{\phi w\}_w - \{\phi\}_w \{w\}_w \rangle_a + \langle \{\phi\}_w \{w\}_w \rangle_a - \langle \{\phi\}_w \rangle_a \langle \{w\}_w \rangle_a \\ &= \langle \text{Cov}_w(\phi, w | j) \rangle_a + \text{Cov}_a(\{\phi\}_w, \{w\}_w) \\ &\equiv S_{\text{within}} + S_{\text{among}}. \end{aligned} \quad (\text{A.8})$$

712 Here we introduced  $\text{Cov}_w(y, z | j) \equiv \{yz\}_w - \{y\}_w \{z\}_w$  as the covariance between individual properties  $y$  and  $z$   
 713 as measured within group  $j$ , and  $\text{Cov}_a(u, v) = \langle uv \rangle_a - \langle u \rangle_a \langle v \rangle_a$  as the covariance of group properties  $u$  and  $v$   
 714 among groups, where groups are weighted by their group size.

715 Eq. A.8 shows that  $S_{\text{within}}$  quantifies to what extent within groups the trait value  $\phi$  is associated with fitness.  
 716 It can hence be interpreted as the effect of selection taking place within groups. On the other hand,  $S_{\text{among}}$   
 717 measures whether groups with a high mean of  $\phi$  tend to have a high mean fitness. It can hence be interpreted as  
 718 the selection component that results from selection among groups.

## 719 A.4 Multilevel selection 2

720 We note that the calculations for MLS 1 can be executed for subdivided populations regardless of whether the  
 721 groups themselves can in any meaningful way be said to reproduce or die. In other words, group selection  
 722 according to MLS 1 does not require that the groups can themselves be considered replicators. An alternative  
 723 formalism, called MLS 2, does explicitly require Darwinian dynamics at the level of groups.

724 The idea of MLS 2 is that, if the groups themselves are replicators, the Price equation can be applied at the  
 725 level of groups. Now the relevant population is the population of groups, and the Price equation can describe the

726 evolution of any trait  $\Phi$  that is a property of groups:

$$\Delta\bar{\Phi} = \underbrace{\text{Cov}(\Phi, \omega)}_{\text{group-level selection}} + \underbrace{\overline{\omega\Delta\Phi}}_{\text{group-level transmission}}. \quad (\text{A.9})$$

727 Importantly, the relative fitness  $\omega_j$  in this Price equation now represents the fitness of group  $j$ , that is, the  
728 (relative) number of groups at time  $t_2$  that are its offspring (including the group itself, if it survives until  $t_2$ ).

729 If we are interested in the evolution of a particular trait at the individual level  $\phi$  – such as the level of altruism  
730 – we are free to choose  $\Phi$  to be the group mean of  $\phi$ ; that is,  $\Phi_j = \{\phi|j\}_w$ . The first term in Eq. A.9 then measures  
731 the effect of selection at the group level on the mean trait value of groups. The second term quantifies the effect  
732 of bias in the changes in  $\Phi$  between ancestral groups and their offspring; this reflects the internal evolution of  
733 groups.

## 734 B Linear stability analysis

735 We here provide the details of the linear stability analysis for the 1D habitat that is presented in Fig. 3b,c and  
736 Fig. S2.

### 737 B.1 Mathematical analysis

738 Consider a population of individuals that each have the same level of altruism  $\phi$ . If the carrying capacity is large,  
739 the dynamics if the density  $\rho(x, t)$  can be approximated by the following mean-field equation:

$$\frac{\partial^2 \rho}{\partial t^2} = g_0 \rho \left( 1 - c\phi + \frac{b_{\max} \phi (G_a * \rho)}{b_{\max}/b_0 + \phi (G_a * \rho)} \right) \left( 1 - \frac{G_{rc} * \rho}{K} \right) - d\rho + k_D \frac{\partial^2 \rho}{\partial x^2}. \quad (\text{B.1})$$

740 Here,  $G_a$  and  $G_{rc}$  are the kernel functions used in Eq. 1 and Eq. 2 to define the availability of public good and  
741 the local density, respectively. The notation  $f * h$  stands for the convolution of functions  $f$  and  $h$ . Eq. B.1 has  
742 a homogeneous equilibrium solution  $\rho(x, t) = \rho_0 > 0$ ; we ask under what conditions this solution is (linearly)  
743 unstable to periodic perturbations so that colonies can form spontaneously.

744 To find out, we first identify  $\rho_0$  by equating Eq. B.1 to zero and solving for  $\rho(x, t) = \rho_0$ . Ignoring the trivial  
745 solution  $\rho_0 = 0$ , the equation is quadratic and can be solved straightforwardly. Out of the two solutions, one  
746 is negative and hence irrelevant. The remaining solution depends on all parameters except for the diffusion  
747 constant  $k_D$ .

748 We then consider a periodic perturbation

$$\rho(x, t) = \rho_0 + \epsilon(t) \sin(2\pi x/\lambda) \quad (\text{B.2})$$

749 with a very small (infinitesimal) amplitude  $\epsilon(0)$  and ask whether  $\epsilon(t)$  will grow or decay. To obtain a dynamic  
750 equation for  $\epsilon(t)$  we insert Eq. B.2 into Eq. B.1. In doing so, we have to work out the convolutions of the Gaussian  
751 kernel functions  $G_a$  and  $G_{rc}$  with the sine wave of Eq. B.2. From the Convolution Theorem it follows that, for

752 any real-valued, normalized, symmetric kernel function  $f(x)$  that has a Fourier transform  $\hat{f}(\omega)$ , the convolution  
753 with a sine wave is again a sine wave, but with a reduced amplitude:

$$f * \rho = \rho_0 + \epsilon(t)\hat{f}(2\pi/\lambda) \sin(2\pi x/\lambda). \quad (\text{B.3})$$

754 In the specific case where  $f(x)$  is Gaussian with standard deviation  $\sigma$ , we get

$$\hat{f}(2\pi/\lambda) = \exp(-2\pi^2 \sigma^2/\lambda^2). \quad (\text{B.4})$$

755 The convolutions with  $G_a$  and  $G_{rc}$  follow directly from Eq. B.3 and Eq. B.4.

756 We then expand the resulting equation to first order in  $\epsilon(t)$ . Because  $\rho_0$  is the homogeneous solution, the  
757 zeroth-order term vanishes. The result is a linear equation of the form:

$$\frac{\partial \epsilon(t)}{\partial t} = E(\lambda)\epsilon(t), \quad (\text{B.5})$$

758 where the factor  $E(\lambda)$  can be written as:

$$E(\lambda) = \underbrace{\left( \frac{g_0(b_{\max}^2/b_0) \phi \rho_0(1 - \rho_0/K)}{(b_{\max}/b_0 + \phi \rho_0)^2} \right)}_{\text{altruism}} \exp \left[ -2 \left( \frac{\pi \sigma_a}{\lambda} \right)^2 \right] \underbrace{-2d \left( \frac{\pi \sigma_m}{\lambda} \right)^2}_{\text{motility}} - \underbrace{\left( \frac{d\rho_0/K}{1 - \rho_0/K} \right) \exp \left[ -2 \left( \frac{\pi \sigma_{rc}}{\lambda} \right)^2 \right]}_{\text{resource competition}}. \quad (\text{B.6})$$

759 The solution of Eq. B.5 is exponential, with growth rate or eigenvalue  $E(\lambda)$ . Hence, if Eq. B.6 is positive for some  
760 wavelength  $\lambda$ , perturbations with this wavelength are predicted to grow exponentially. Because demographic  
761 noise produces perturbations of any wavelength, this is expected to eventually give rise to periodic density  
762 fluctuations with a similar wavelength.

763 Eq. B.6 provides considerable insight. It consists of three terms, expressing the effects of altruism, motility,  
764 and resource competition. The three length scales in the system—the scale of altruism  $\sigma_a$ , the scale of motility  
765  $\sigma_m$ , and the scale of competition  $\sigma_{rc}$ —each appear in their appropriate term.

766 The first term, describing the effect of altruism, is the only positive one, and it scales with  $\phi$ . This shows that  
767 altruism is required to obtain a positive eigenvalue for any wavelength  $\lambda$ . Indeed, altruism tends to amplify density  
768 differences: because the benefits of altruism grow with the number of altruists in the local neighborhood, its  
769 effect is to increase the reproduction rate in regions of high density, which tends to further increase that density.  
770 However, the equation shows that this positive contribution is exponentially suppressed if the wavelength  
771  $\lambda$  is small relative to the scale of altruism  $\sigma_a$ ; this is because such short waves average out within the social  
772 neighborhoods of individuals.

773 The second term reflects the effect of motility. Random motion (diffusion) is a homogenizing force and  
774 therefore quenches density fluctuations, as reflected in the negative sign of this term. However, because diffusion  
775 is famously slow on large length scales, only short wavelengths are strongly affected: if the wavelength  $\lambda$  exceeds  
776 the scale of motility (the typical distance traveled by an individual in a generation time) the contribution becomes  
777 small.

778 The third term describes the effect of resource competition. Resource competition reduces the reproduction

779 rate in areas with a larger density and thus suppresses density differences, which explains that its contribution is  
780 negative. However, if the wavelength is small relative to the scale of competition  $\sigma_{rc}$ , the density wave averages  
781 out within the competitive neighborhood of individuals and the homogenizing effect becomes weak.

782 Together, this clearly indicates in which regime we ought to expect colonies. Density fluctuations are  
783 suppressed by diffusion if their wavelength  $\lambda$  is smaller than  $\sigma_m$ , and by resource competition if  $\lambda$  is larger than  
784  $\sigma_{rc}$ . Instabilities are therefore expected only if there is a gap between these two regimes. At the same time, the  
785 positive contribution of altruism becomes weak if  $\lambda$  is smaller than  $\sigma_a$ . For altruism to be effective in the “gap”,  
786  $\sigma_a$  therefore should be chosen smaller than  $\sigma_{rc}$ . In summary, instability requires that the diffusion constant is  
787 small enough, the scale of competition is large enough, and the scale of altruism is smaller than the scale of  
788 competition. Apart from these rules of thumb, Eq. B.6 can of course be evaluated numerically to make precise  
789 predictions; see Fig. S2.

## 790 B.2 Validation of predictions

791 In Fig. 3b,c and Fig. S2 we test predictions based on the linear stability analysis using simulations. The key  
792 predictions are (i) the region of parameter space where colonies can form, and (ii) the wavelength of the resulting  
793 pattern. The following methods were used.

794 As illustrated with the red dot and arrow in Fig. S2a, both predictions are found by maximizing  $E(\lambda)$ . Fig. S2b  
795 shows a contour plot of the maximal value of  $E(\lambda)$  under variation of the scales; Fig. S2c the corresponding  
796 wavelengths. Both values were obtained by differentiating Eq. B.6 and numerical root finding.

797 To test the predictions we performed a large number of simulations using different values for  $\sigma_{rc}$  and  $\sigma_m$ .  
798 (We used  $\sigma_{rc} \in \{1, 1.2, 1.4, \dots, 5\}$  and  $\sigma_m \in \{0.0671, 0.100, 0.134, \dots, 0.671\}$  in all  $21 \times 19 = 399$  combinations.) As a  
799 simple proxy for the presence of colonies, we measured the variance of the (smoothed) population density (KDE)  
800 over space. To identify the dominant wavelength in the density pattern, we calculated the Fourier transform of  
801 the KDE and selected the mode with the largest amplitude.

802 The simulations were performed as usual and using default parameters except for the following adjustments:

- 803 1. All individuals were initialized with a trait value  $\phi = 0.05$ .
- 804 2. In these simulations, we were interested in the ecological patterns of a population with fixed  $\phi$ ; therefore  
805 the mutation rate was set to  $\mu = 0$  to disable evolution.
- 806 3. The simulation was run for  $T = 2\,400$  generations. (The colonies establish very rapidly.)
- 807 4. Starting at  $t = 400$  generations, after each time interval of 80 generations the following analysis was  
808 performed:
  - 809 (a) Calculate a KDE using a Gaussian kernel with standard deviation/bandwidth  $\sigma_a/2$ .
  - 810 (b) Calculate the variance of this KDE.
  - 811 (c) Calculate the Fourier transform of the KDE and identify the wave number with the largest amplitude.

812       After the simulation, the mean value of the variance was reported. It is this variance that is plotted in Fig  
813 3c and Fig. S2e. Also, the mean value of the wave number with the largest amplitude was reported; this wave  
814 number was transformed to a wave length, which was plotted in Fig. S2f.



815 **Supplementary Figures**

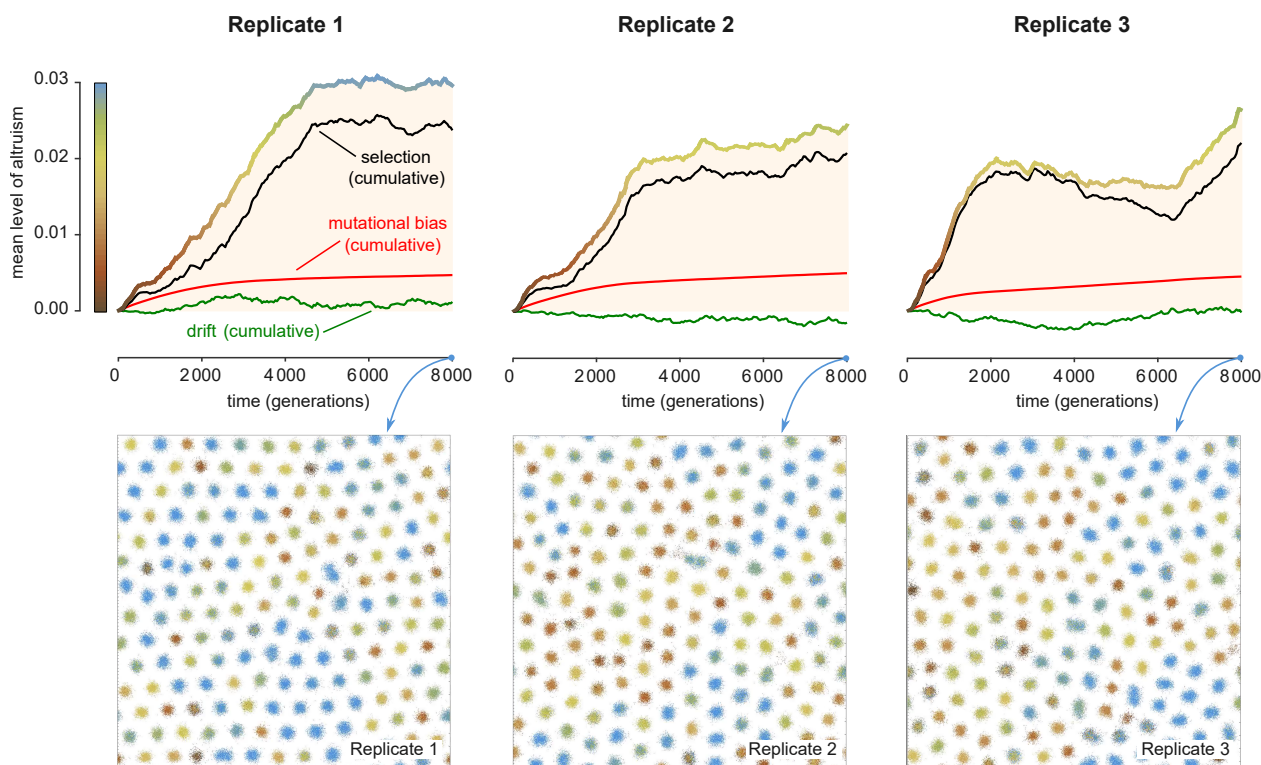

**Figure S1. Evolutionary forces and snapshots of replicates (2D habitat)** Results are shown based on three simulations that were identical except that the random-number generator was initiated with different random seeds. Fig. 2 presents results of Replicate 1.

The three figures on top show the mean level of altruism through time (thick colored line). The rise in mean level of altruism can be decomposed into three contributions: natural selection, mutational bias, and random drift, using the method explained in Appendix A.2. Plotted are the cumulative contributions of natural selection (black) transmission (red) and genetic drift (green). In all cases, the main contribution is selection, which is consistently positive during the first stretch of the simulations. That said, a mutational bias is revealed as well (red lines). This bias arises because, in this simulation, negative values of  $\phi$  were prohibited (see Methods) and hence mutations with negative effect are sometimes truncated, especially in individuals with a low trait value. (The smoothness of the red line is a result of the law of large numbers.) The cumulative effect of random drift (green line) is minor in all three replicates.

The three figures at the bottom show snapshots of the population at the end of the simulations. In all three cases a hexagonal pattern of colonies has emerged.

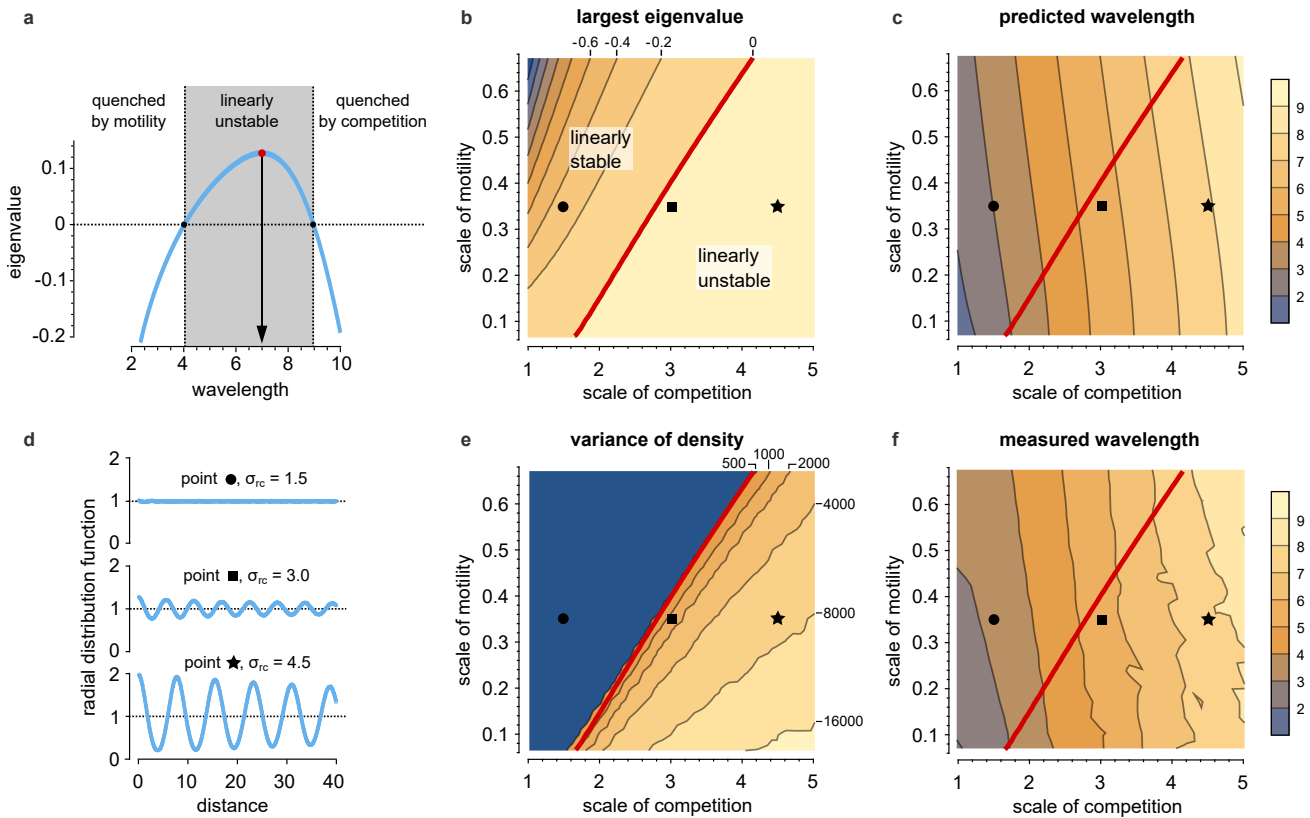

**Figure S2. Linear stability analysis** To help understand the conditions for the formation of colonies, a linear stability analysis studies whether, in an initially homogeneous population, small periodic density perturbations tend to grow. (See Methods for the full derivations.) If they do, this leads to the formation of “colonies”. (a) For given model parameters, each wavelength is associated with an eigenvalue; if the eigenvalue is positive, density waves with this wavelength tend to grow. The figure plots the eigenvalue for a range of wavelengths as calculated for the default parameters of the 1D model (Table 1), additionally assuming all individuals have  $\phi = 0.05$ . Perturbations with small wavelength are quenched by motility; those with a long wavelength by resource competition. In between, a window exists (gray shading) of wavelengths that have a positive eigenvalue. This explains the colony formation in the default parameters. The wavelength with the largest eigenvalue (indicated with the red dot and black arrow) provides a prediction for the wavelength—the distance between neighboring colonies. (b) The largest eigenvalue is plotted as a function of the spatial scales in the system: the scale of motility  $\sigma_m$  and the scale of competition  $\sigma_{rc}$ . (Remember that the scale of altruism  $\sigma_a$  is 1 by definition of the unit of length.) Otherwise, the assumptions are as in panel (a). Colony formation is expected only in the linearly unstable regime, to the right of the red contour line. (c) For the same conditions used in panel (b), the predicted wavelength is plotted. As a rule of thumb, it is somewhat smaller than  $2\sigma_{rc}$ . (d) Simulations were performed for the parameters indicated with black symbols in panels (b), (c), (e), and (f), assuming that all individuals have an immutable level of altruism  $\phi = 0.05$ . Shown are the resulting radial distribution functions. As expected, the system is near homogeneous at  $\sigma_{rc} = 1.5$  (black circle, in the linearly stable regime), weak pair correlations are seen for  $\sigma_{rc} = 3.0$  (marginally unstable), and strong correlations emerge for  $\sigma_{rc} = 4.5$  (far in the unstable regime), indicating colony formation. (e) Simulations were performed for a large number of combinations of the spatial scales ( $19 \times 21 = 399$  in total); here, the variance of the local population density is plotted as a simple proxy for colony formation. Clearly, colonies form only in the parameter regime predicted in panel (b). (f) For the simulations of panel (e), the wavelength of the resulting colonies is plotted. (See Methods.) The results agree broadly with the predictions of panel (c).

### Replicate 2

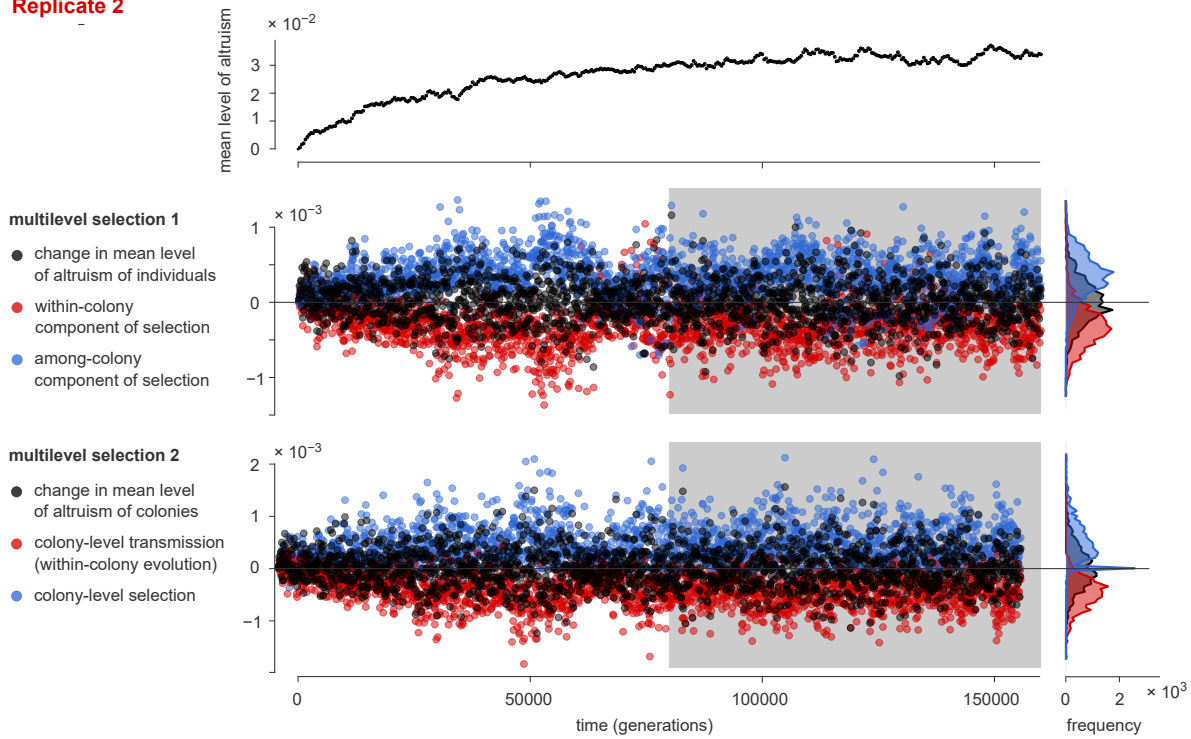

### Replicate 3

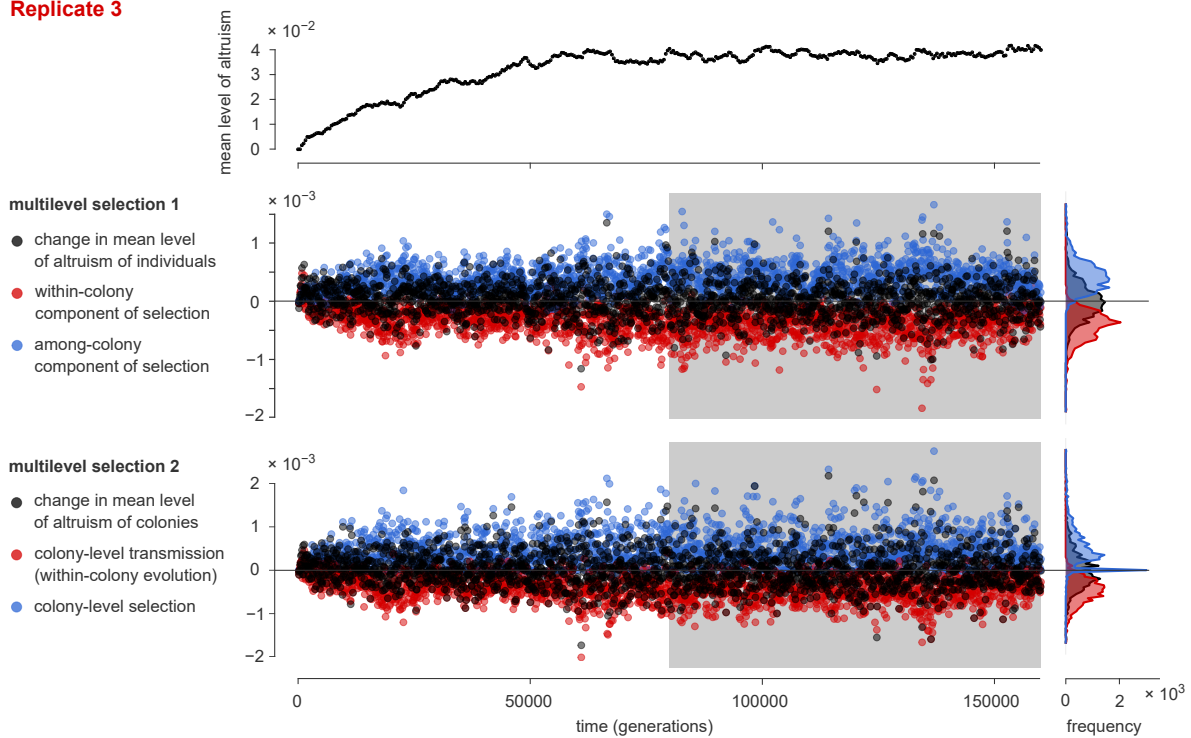

**Figure S3. Quantification of multilevel selection (MLS) in replicates (1D habitat).** Fig. 4 shows results of the quantification of MLS in a single simulation run. To demonstrate the reproducibility of these results, this figure shows the same analysis for two additional replicates. The simulations for all three replicates were identical except that the random-number generator was initiated with a different random seed. All replicates show very similar trends. In particular, the marginal distributions of all quantities are highly consistent. Their statistics are summarized in Table S1.

816 **Supplementary Tables**

| MLS 1 | quantity                             | replicate | % positive | % negative | mean                     | 95% CI                   |
|-------|--------------------------------------|-----------|------------|------------|--------------------------|--------------------------|
|       | change in mean of $\phi$             | 1         | 49.4       | 50.6       | $0.9 \times 10^{-5}$     | $\pm 2.0 \times 10^{-5}$ |
|       |                                      | 2         | 49.4       | 50.6       | $0.4 \times 10^{-5}$     | $\pm 1.8 \times 10^{-5}$ |
|       |                                      | 3         | 48.2       | 51.8       | $-9.1 \times 10^{-7}$    | $\pm 1.7 \times 10^{-5}$ |
|       | within-colony component of selection | 1         | 2.4        | 97.6       | $-3.8 \times 10^{-4}$    | $\pm 0.4 \times 10^{-4}$ |
|       |                                      | 2         | 10.8       | 89.2       | $-3.2 \times 10^{-4}$    | $\pm 0.4 \times 10^{-4}$ |
|       |                                      | 3         | 2.2        | 98.8       | $-4.1 \times 10^{-4}$    | $\pm 0.4 \times 10^{-4}$ |
|       | among-colony component of selection  | 1         | 98.7       | 1.3        | $\pm 4.2 \times 10^{-4}$ | $\pm 0.4 \times 10^{-4}$ |
|       |                                      | 2         | 90.1       | 9.9        | $3.6 \times 10^{-4}$     | $\pm 0.5 \times 10^{-4}$ |
|       |                                      | 3         | 97.9       | 2.1        | $4.4 \times 10^{-4}$     | $\pm 0.4 \times 10^{-4}$ |

  

| MLS 2 | quantity                  | replicate | % positive | % negative | mean                  | 95% CI                   |
|-------|---------------------------|-----------|------------|------------|-----------------------|--------------------------|
|       | change in mean of $\Phi$  | 1         | 47.6       | 52.4       | $0.9 \times 10^{-5}$  | $\pm 2.0 \times 10^{-5}$ |
|       |                           | 2         | 47.7       | 52.3       | $0.4 \times 10^{-5}$  | $\pm 1.9 \times 10^{-5}$ |
|       |                           | 3         | 45.4       | 54.6       | $-0.1 \times 10^{-5}$ | $\pm 1.8 \times 10^{-5}$ |
|       | colony-level transmission | 1         | 2.5        | 97.5       | $-4.6 \times 10^{-4}$ | $\pm 0.5 \times 10^{-4}$ |
|       |                           | 2         | 4.2        | 95.8       | $-4.8 \times 10^{-4}$ | $\pm 0.3 \times 10^{-4}$ |
|       |                           | 3         | 3.4        | 96.6       | $-4.9 \times 10^{-4}$ | $\pm 0.4 \times 10^{-4}$ |
|       | colony-level selection    | 1         | 82.6       | 1.6        | $4.7 \times 10^{-4}$  | $\pm 0.4 \times 10^{-4}$ |
|       |                           | 2         | 86.3       | 2.3        | $4.9 \times 10^{-4}$  | $\pm 0.4 \times 10^{-4}$ |
|       |                           | 3         | 82.8       | 3.6        | $4.8 \times 10^{-4}$  | $\pm 0.5 \times 10^{-4}$ |

**Table S1. Statistics of the multilevel selection analysis of Figs. 4 and S3.** Error bars for the means are given as 95% confidence intervals (see Methods).

## 817 **Supplementary Movie Captions**

818 **Movie S1.** Movie depicting the dynamics of the simulation described in Fig. 2, which is also shown in Fig. S1  
819 as Replicate 1. Default parameters were used (Table 1). The video plots the positions of all individuals, and the  
820 level of altruism of each individual is indicated with the same color scale as in Fig. 2 and 3a. The ticks on the  
821 left-hand vertical axis show the scale of altruism, the ticks on the right-hand vertical axis the scale of competition.  
822 A high-quality version of this movie is shared here: <https://doi.org/10.5281/zenodo.5727313>.

823 **Movie S2.** Movie depicting the dynamics of the simulation Replicate 2 described in Fig. S1. Default parameters  
824 were used (Table 1). In the video, the left-hand panel shows the positions of all individuals, as in 5, using the same  
825 color scale as in Fig. 2 and 3a. The right-hand panel plots for each position in the habitat the value  $A$ , which can  
826 be interpreted as the amount of public good at that position, as provided by the altruists in the local environment.  
827 The ticks on the left-hand vertical axis show the scale of altruism, the ticks on the right-hand vertical axis the  
828 scale of competition. A high-quality version of this movie is shared here: <https://doi.org/10.5281/zenodo.5727313>.

829

830 **Movie S3.** Movie depicting the dynamics of the simulation Replicate 3 described in Fig. S1. Default parameters  
831 were used (Table 1). In the video, the left-hand panel shows the positions of all individuals, as in 5, using the same  
832 color scale as in Fig. 2 and 3a. The right-hand panel plots for each position in the habitat the value  $A$ , which can  
833 be interpreted as the amount of public good at that position, as provided by the altruists in the local environment.  
834 The ticks on the left-hand vertical axis show the scale of altruism, the ticks on the right-hand vertical axis the  
835 scale of competition. A high-quality version of this movie is shared here: <https://doi.org/10.5281/zenodo.5727313>.

836
